# 1 Phylogenomic Analysis of Protein-Coding Genes Resolves Complex 2 Gall Wasp Relationships

3

4 Jack Hearn<sup>1,#</sup>, Erik Gobbo<sup>2,#</sup>, José Luis Nieves-Aldrey<sup>3</sup>, Antoine Branca<sup>4</sup>, James A. Nicholls<sup>5</sup>, Georgios  
5 Koutsovoulos<sup>6</sup>, Nicolas Lartillot<sup>7</sup>, Graham N. Stone<sup>8,\*</sup> and Fredrik Ronquist<sup>9,\*,+</sup>

6

7 <sup>1</sup> *Vector Biology Department, Liverpool School of Tropical Medicine, Liverpool, United Kingdom; e-*  
8 *mail: [jack.hearn@lstm.ac.uk](mailto:jack.hearn@lstm.ac.uk); ORCID: <https://orcid.org/0000-0003-3358-4949>*

9 <sup>2</sup> *Department of Bioinformatics and Genetics, Swedish Museum of Natural History, Stockholm,*  
10 *Sweden and Department of Zoology, Stockholm University, Stockholm, Sweden; e-mail:*  
11 *[erik.gobbo@nrm.se](mailto:erik.gobbo@nrm.se); ORCID: <https://orcid.org/0000-0001-9897-8610>*

12 <sup>3</sup> *Departamento de Biodiversidad y Biología Evolutiva, Museo Nacional de Ciencias Naturales (CSIC),*  
13 *Madrid, Spain; e-mail: [aldrey@mncn.csic.es](mailto:aldrey@mncn.csic.es); ORCID: <https://orcid.org/0000-0002-4711-7455>*

14 <sup>4</sup> *Ecologie Systématique et Evolution, CNRS, AgroParisTech, Université Paris-Saclay, Orsay, France; e-*  
15 *mail: [antoine.branca@universite-paris-saclay.fr](mailto:antoine.branca@universite-paris-saclay.fr); ORCID: <https://orcid.org/0000-0001-8475-1386>*

16 <sup>5</sup> *Australian National Insect Collection, CSIRO, Canberra, Australia; e-mail: [james.nicholls@csiro.au](mailto:james.nicholls@csiro.au);*  
17 *ORCID: <https://orcid.org/0000-0002-9325-563X>*

18 <sup>6</sup> *Institute of Ecology and Evolution, University of Edinburgh, Edinburgh, United Kingdom; e-mail:*  
19 *[gdkoutsovoulos@gmail.com](mailto:gdkoutsovoulos@gmail.com); ORCID: <https://orcid.org/0000-0003-3406-3715>*

20 <sup>7</sup> *Laboratoire de Biométrie et Biologie Evolutive, Université Claude Bernard Lyon 1, Lyon, France; e-*  
21 *mail: [nicolas.lartillot@univ-lyon1.fr](mailto:nicolas.lartillot@univ-lyon1.fr); ORCID: <https://orcid.org/0000-0002-9973-7760>*

22 <sup>8</sup> *Institute of Ecology and Evolution, University of Edinburgh, Edinburgh, United Kingdom; e-mail:*  
23 *[graham.stone@ed.ac.uk](mailto:graham.stone@ed.ac.uk); ORCID: <https://orcid.org/0000-0002-2737-696X>*

24 <sup>9</sup> *Department of Bioinformatics and Genetics, Swedish Museum of Natural History, Stockholm,*  
25 *Sweden and Department of Zoology, Stockholm University, Stockholm, Sweden; e-mail:*  
26 *[fredrik.ronquist@nrm.se](mailto:fredrik.ronquist@nrm.se); ORCID: <https://orcid.org/0000-0002-3929-251X>*

27

28 *# These authors contributed equally to this work.*

29 *\* These authors also contributed equally to this work.*

30 *+ Corresponding author.*

31

32 **Short title:** Phylogenomic analysis resolves gall wasp relationships

33

## 34 **Abstract**

35 The phylogeny of gall wasps (Cynipidae) and their parasitic relatives has attracted considerable  
36 attention in recent years. The family is now widely recognized to fall into thirteen natural lineages,  
37 designated tribes, but the relationships among them have remained elusive. This has stymied any  
38 progress in understanding how cynipid gall inducers evolved from insect parasitoids, and what role  
39 inquilinism (development as a herbivore inside galls induced by other cynipids) might have played in  
40 this transition. A recent analysis of ultraconserved elements (UCEs) represents the first attempt at  
41 resolving these questions using phylogenomics. Here, we present the first analysis based on protein-  
42 coding sequences from genome and transcriptome assemblies. To address potential problems due  
43 to model misfit, we focus on models that accommodate site-specific amino-acid profiles and that are  
44 less sensitive than standard models to long-branch attraction. Our results show that the Cynipidae as  
45 previously circumscribed are not monophyletic. Specifically, the Paraulacini and a clade formed by  
46 Diplolepidini + Pediastidini both fall outside a core clade (Cynipidae s. str.), which is more closely  
47 related to Figitidae. This result is robust to the exclusion of long-branch taxa that could potentially  
48 mislead the analysis, and it is consistent with the UCE analysis. Given this, we propose that the  
49 Cynipidae be divided into three families: the Paraulacidae, Diplolepididae and Cynipidae (s. str.). Our  
50 results suggest that the Eschatocerini are the sister group of the remaining Cynipidae (s. str.). Within  
51 the latter, our results are consistent with the UCE analysis but place two additional tribes: (1) the  
52 Aylacini (s. str.), more closely related to the oak gall wasps (Cynipini) and some of their inquilines  
53 (Ceroptresini) than to other herb gallers (Aulacideini and Phanacidini); and (2) the Qwaqwaiini, likely  
54 the sister group to Synergini (s. str.) + Rhoophilini. Several alternative scenarios for the evolution of  
55 cynipid life histories are compatible with the relationships suggested by our analysis, but all are  
56 complex and require multiple shifts between parasitoids, inquilines and gall inducers. Linking the  
57 different types of life-history transitions to specific genomic signatures may be one of the best ways  
58 of differentiating among these alternative scenarios. Our study represents the first step towards  
59 enabling such analyses.

## 60 **Introduction**

61 Gall wasps (Hymenoptera: Cynipidae) induce the development of highly modified plant tissues,  
62 termed galls, in which their immature stages develop (Melika & Abrahamson 2002; Stone et al.  
63 2002). The cynipid larva is enclosed inside a gall chamber lined with specialised nutritive cells formed  
64 by the plant in response to signals released by the gall wasp egg and larva (Stone & Schönrogge  
65 2003; Harper et al. 2004; Hearn et al. 2019). While all cynipids appear able to induce the  
66 development of such nutritive tissues, several lineages – termed inquilines – can only induce  
67 nutritive tissue development within galls initiated by other species (Sanver & Hawkins 2000). The  
68 inquilines can thus be seen as cynipids that induce a 'gall within a gall'. The presence of inquilines  
69 can negatively affect the fitness of the primary gall-inducer, in many cases killing them (László &  
70 Tóthmérész 2006). In *Periclistus* inquilines, it has been reported that the ovipositing female kills the  
71 larva of the gall inducer by stabbing it with her ovipositor, potentially injecting harmful substances in  
72 the process (Shorthouse 1973).

73 Several hypotheses on the mechanism of cynipid gall induction have been advanced, partly inspired  
74 by knowledge of other gall-inducing organisms: secretion of auxins (Tooker & Helms 2014), injection  
75 of virus-like particles (Cornell 1983; Cambier et al. 2019), manipulation of plant NOD factors (Hearn  
76 et al. 2019), or involvement of bacterial or fungal symbionts (Hearn et al. 2019). However, in  
77 contrast to some other gall induction systems (Harris & Pitzschke 2020), there is no conclusive  
78 evidence for any of these hypotheses in cynipids.

79 Our understanding of the evolutionary origin of cynipid gall inducers and inquilines is equally poor.  
80 The Cynipidae are deeply nested within the insect-parasitic Apocrita (Ronquist 1995, 1999; Heraty et  
81 al. 2011; Sharkey et al. 2011; Klopstein et al. 2013; Peters et al. 2017), and all other members of the  
82 superfamily Cynipoidea are insect parasitoids, so it has long been clear that the phytophagous gall  
83 inducers and inquilines must have evolved from insect-parasitic ancestors. It has generally been  
84 assumed that the phytophagous forms constitute a monophyletic lineage in the Cynipoidea, the

85 family Cynipidae, although it has been surprisingly difficult to find morphological characters  
86 supporting their monophyly (Liljeblad & Ronquist 1998; Ronquist 1999; Ronquist et al. 2015).

87 Since Ashmead (1903), the Cynipidae have commonly been divided into six tribes: the Cynipini,  
88 Diplolepidini (or Rhoditini), Pediaspidini, Eschatocerini, Aylacini and Synergini. The Cynipini comprise  
89 the oak gall inducers, one of the largest radiations of insect gall inducers with more than 1,000  
90 described species, most of which are associated with oaks (*Quercus*). The Diplolepidini consist of  
91 the gall inducers on roses (*Rosa*), among them the well-known bedeguar gall wasp, *Diplolepis rosae*.  
92 The Pediaspidini and Eschatocerini are two small tribes, originally including a single genus each:  
93 *Pediaspis*, a European genus inducing galls on maples (*Acer*), and *Eschatocerus*, a South American  
94 gall inducer on *Vachellia* (commonly known as thorn trees or acacias) and other woody members of  
95 Fabaceae. The inquilines are grouped in this system into the Synergini, and the remaining gall  
96 inducers, mostly associated with herbaceous host plants, in the Aylacini.

97 Early analyses of cynipid relationships based on morphological data suggested that the Aylacini form  
98 a paraphyletic assemblage of early-diverging cynipid lineages (Ronquist 1994; Liljeblad & Ronquist  
99 1998), consistent with ideas presented over a century ago by the famous cynipidologist and later  
100 sexologist Alfred Kinsey (Kinsey 1920). They also suggested that the oak gall wasps (Cynipini) and the  
101 inquilines (Synergini) form natural monophyletic groups. The former appeared to be related to the  
102 Diplolepidini, Eschatocerini and Pediaspidini, all inducing galls on trees or bushes belonging to the  
103 rosid clade of angiosperms (“woody rosids”). An important result was that the genus *Himalocynips*, a  
104 cynipid from Nepal with unknown biology and originally placed in a separate subfamily (Yoshimoto  
105 1970), was grouped with *Pediaspis* (Liljeblad and Ronquist 1998). These early analyses also indicated  
106 that the inquilines (Synergini) originated from gall inducers related to the Aylacini genera  
107 *Diastrophus* and *Xestophanes* (Ronquist 1994; Liljeblad & Ronquist 1998).

108 Subsequent analyses of molecular data and combined molecular, morphological and life-history data  
109 (Nylander et al. 2004; Ronquist et al 2015) have confirmed some of these results and rejected

110 others. Among the inquilines, only *Periclistus* (inquilines in *Diplolepis* galls on *Rosa*) and  
111 *Synophromorpha* (inquilines in *Diastrophus* galls on *Rubus*) appear to be closely related to  
112 *Diastrophus* and *Xestophanes*. Together, they form a strongly supported lineage of gall inducers and  
113 inquilines associated with herbaceous and woody hosts in the Rosaceae, now recognized as the tribe  
114 Diastrophini (Ronquist et al 2015; Table 1). The remaining Aylacini appear to fall into three distinct  
115 lineages that are now recognized as separate tribes (Ronquist et al 2015): (1) the Aylacini (s. str.), gall  
116 inducers associated with poppies (*Papaver*); (2) the Aulacideini, gall inducers mostly associated with  
117 Asteraceae and Lamiaceae, but also with a few other families, including Papaveraceae; and (3) the  
118 Phanacidini, gall inducers mainly associated with Asteraceae and Lamiaceae, and often inducing  
119 stem galls. The remaining inquilines appear to fall into two distinct monophyletic lineages (Ronquist  
120 et al. 2015): (1) the Ceroptresini, including the single genus *Ceroptres* associated with Cynipini oak  
121 galls; (2) and a lineage consisting of Synergini (s. str.), comprising the remaining inquilines of Cynipini  
122 oak galls, and *Rhoophilus*, an inquiline in lepidopteran galls on species of *Searsia* (Anacardiaceae)  
123 (van Noort et al. 2007). Several analyses have supported a sister-group relationship between  
124 *Rhoophilus* and the remaining Synergini (s. str.) (Liljeblad & Ronquist 1998; Ronquist et al. 2015; Ide  
125 et al. 2018) and recently it was proposed to recognize a separate tribe for *Rhoophilus*, the  
126 Rhoophilini (Lobato-Vila et al. 2022).

127 Among the species associated with woody rosids, the molecular analyses have clearly supported the  
128 monophyly of the oak gallers (Cynipini) and rose gallers (Diplolepidini; Table 1). In recent years, two  
129 additional lineages associated with woody rosids have been added, the Qwaqwaiini and Paraulacini  
130 (Table 1). The tribe Qwaqwaiini is based on a newly discovered gall inducer on *Scolopia* (Salicaceae)  
131 in South Africa (Liljeblad et al. 2011), while the Paraulacini constitute a re-discovered lineage of  
132 cynipids associated with galls on southern beeches (*Nothofagus*; Nothofagaceae) (Nieves-Aldrey et  
133 al. 2009).

134 In conclusion, this results in the current classification of the Cynipidae into 13 tribes (Table 1)  
135 (Ronquist et al. 2015; Lobato-Vila et al. 2022). The analyses described above, based only on a few  
136 molecular markers, have been unable to resolve the relationships between these 13 lineages, with  
137 three notable exceptions. First, there has been fairly strong evidence for a sister-group relationship  
138 between the Diplolepidini and Pediaspidini, suggesting that at least these two lineages of well-  
139 known woody-rosid gallers are related (Ronquist et al. 2015). Second, there has been support for a  
140 sister-group relationship between the two major lineages of herb gallers, the Aulacideini and  
141 Phanacidini (Nylander et al. 2004; Ronquist et al. 2015). Third, there is strong support for the sister-  
142 group relationship between the Rhoophilini and Synergini (s. str.), as mentioned above. Many of the  
143 tribes, however, appear to represent isolated lineages, with no close relatives among the other  
144 tribes (Nylander et al. 2004; Ronquist et al. 2015).

145 Regardless of the relationships among the major lineages, these findings have made it clear that the  
146 evolutionary origin of cynipid gall inducers and inquilines is more complicated than originally  
147 thought. In the tribe Diastrophini, for instance, there are two genera of inquilines and two genera of  
148 gall inducers, and the current data indicate that there must have been at least two transitions  
149 between these life-history strategies within the tribe (Ronquist et al 2015). Recent work has also  
150 shown that the tribe Synergini (s. str.), previously considered to consist entirely of inquilines,  
151 includes at least one deeply nested lineage of true gall inducers—*Synergus itoensis* and related  
152 species—inducing galls inside acorns (Abe, Ide, and Wachi 2011; Ide et al. 2018; Gobbo et al. 2020).  
153 There are also observations suggesting that facultative intraspecific inquilinism may occur in  
154 *Diastrophus* (Diastrophini) (Pujade i Villar 1984), and it has been suggested that the remarkable  
155 parallelisms between the Aulacideini and Phanacidini in the evolution of host plant preferences  
156 could be due to facultative or obligate inquilinism among some cynipid herb gallers (Ronquist &  
157 Liljeblad 2001; Nieves-Aldrey, Gómez & Hernández Nieves 2004).

158 The recent discovery of gall-inducing Synergini (s. str.) illustrates how difficult it is to correctly  
159 deduce the life history of insects reared from galls, and previous assumptions about the life history  
160 of different cynipid lineages should be analyzed critically. The Paraulacini are a case in point. Recent  
161 studies have revealed that they are associated with *Nothofagus* galls that are presumably induced by  
162 the chalcidoid genus *Aditrochus*, currently placed in the Pteromalidae, but it has remained unclear  
163 whether the Paraulacini are phytophagous inquilines or parasitoids of some other gall inhabitant  
164 (Nieves-Aldrey et al. 2009; Ronquist et al. 2015). The relatively close relationship between southern  
165 beeches (*Nothofagus*) and oaks, both belonging to the Fagales, would suggest that the Cynipini and  
166 Paraulacini might also be related, and both phytophagous. However, recent genetic analyses have  
167 provided a case where the genome of *Cecinothofagus ibarrai* (Paraulacini) was retrieved from a larva  
168 of *Aditrochus coihuensis*, together with the *Aditrochus coihuensis* genome (Rasplus, Nieves-Aldrey &  
169 Cruaud 2022). This suggests that the Paraulacini are not only parasitoids, they are also likely  
170 koinobiont endoparasitoids in early larval instars, like all other insect-parasitic cynipoids (see below).

171 The life-history of the Eschatocerini is another interesting case. Members of this tribe have been  
172 reared from galls on *Prosopis* and *Vachellia* (formerly *Acacia*) collected in Argentina and Chile, and  
173 they have been assumed to be gall inducers (Nieves-Aldrey & San Blas 2015; Aranda-Rickert et al.  
174 2017). However, like the *Nothofagus* galls, these galls also produce a number of other insects that  
175 could potentially be gall inducers. These include *Allorhogas prosopidis* (Braconidae), a genus of  
176 phytophagous braconids that may be inquilines or gall inducers (Samacá-Sáenz, Egan & Zaldívar-  
177 Riverón 2020), and the chalcidoid *Tanaostigmus coeruleus* (Chalcidoidea, Tanaostigmatidae), which  
178 belongs to a genus that is known to include phytophagous species (either inquilines or gall inducers).

179 The galls are also inhabited by members of several genera of eurytomids, namely *Proseurytoma*,  
180 *Sycophila* and *Eurytoma*. Other members of these genera include true gall inducers, such as  
181 *Proseurytoma gallarum*, a gall inducer on *Geofreoa decorticans* (another Fabaceae sharing habitats  
182 with *Prosopis* and *Acacia*). Preliminary data available to one of us (JLNA) suggest that *Allorhogas* and  
183 *Tanaostigmodes* are both inquilines in *Eschatocerus* galls, which is at least consistent with

184 *Eschatocerus* being the true gall inducer. Here, we will assume that the Eschatocerini are gall  
185 inducers, but additional evidence supporting this conclusion would be highly desirable. Among the  
186 remaining cynipid tribes, we still lack detailed studies of the life history for the Ceroptresini  
187 (apparently inquilines; but see Blair 1949) and Qwaqwaiini (apparently true gall inducers; Liljeblad et  
188 al. 2011).

189 Except for the Cynipidae, the superfamily Cynipoidea comprises the families Austrocynipidae,  
190 Ibalidae, Liopteridae, and Figitidae (Ronquist 1995; 1999). The life history of several species of  
191 ibaliids and figitids is well-studied (Ronquist 1999, and references cited therein). They are all  
192 koinobiont endoparasitoids in early larval instars. Towards the end of their development, they  
193 emerge and consume the remains of the moribund host as ectoparasitoids. The most diverse lineage  
194 is the Figitidae, which has appeared as the sister group of the Cynipidae in most previous analyses  
195 (Ronquist 1995; Ronquist 1999; Buffington, Nylander & Heraty 2007; Buffington et al. 2012; Ronquist  
196 et al. 2015).

197 The origin of the Cynipidae appears to be linked to that of several lineages of gall-associated  
198 Figitidae, which appear to form early-diverging lineages in the family (Ronquist 1995; Ronquist 1999;  
199 Buffington, Nylander & Heraty 2007, Buffington et al. 2012; Ronquist et al 2015). These gall-  
200 associated figitids include the Parnipinae (Ronquist and Nieves-Aldrey 2001), Plectocynipinae (Ros-  
201 Farré & Pujade-Villar 2007; Buffington & Nieves-Aldrey 2011), Thrasorinae (Buffington 2008;  
202 Paretas-Martínez et al 2011), Mikeiinae (Paretas-Martínez et al 2011) and Euceroptresinae  
203 (Buffington & Liljeblad 2008; note that the subfamily name should be Euceroptresinae and not  
204 Euceroptrinae). There is fairly strong evidence that the Parnipinae are koinobiont early-internal-late-  
205 external parasitoids of cynipid gall inducers in the genera *Barbotinia* and *Iraella* (Ronquist et al.  
206 2018). The life-history of the other lineages remains unclear, although they are generally assumed to  
207 be parasitoids of other inhabitants in the cynipid and chalcidoid galls from which they have been  
208 reared.



209 A recent paper represents the first attempt at resolving phylogenetic relationships in the Cynipoidea  
210 using phylogenomic data (Blaimer et al. 2020). Specifically, this analysis used an approach known as  
211 ultra-conserved elements (UCEs) to obtain genomic data from a wide range of cynipoid exemplars,  
212 representing all families except the Austrocynipidae and spanning a significant amount of the known  
213 diversity within each family. Several surprising results emerged from this UCE analysis. First, the  
214 Liopteridae and Ibalidae were placed within the Figitidae, among the early-diverging gall-associated  
215 lineages. Second, the Paraulacini and the Diplolepidini + Pediaapidini were placed outside the clade  
216 formed by the Figitidae and the remaining Cynipidae (the Cynipidae s. str.) - a relationship first  
217 hinted at in Hymenoptera-wide analyses (Peters et al. 2017). Finally, the analysis suggested that the  
218 Eschatocerini may be the sister group of the Figitidae, although the evidence for this was weak and  
219 alternative placements appeared under some analysis settings.

220 The analysis we present here is the first phylogenomic analysis based on genome and transcriptome  
221 assemblies, and it allows a largely independent test of the results from the UCE analysis. In contrast  
222 to the UCE analysis, our taxon sampling is focused on cynipids. It lacks ibaliids and liopterids, and is  
223 relatively sparse with respect to figitids. However, it includes representatives of all cynipid tribes  
224 except the recently recognized Rhoophilini. Importantly, it includes the Qwaqwaiini and Aylacini (s.  
225 str.), both of which were missing from the UCE analysis. The UCE study claims to include one  
226 representative of the Aylacini (s. str.), *Aylax salviae*. However, this species has long been placed in  
227 the genus *Neaylax* (Nieves-Aldrey 1994, 2001), which is deeply nested inside the Aulacideini  
228 (Ronquist et al. 2015). Specifically, *Neaylax salviae* belongs to a clade of Aulacideini gallers of  
229 Lamiaceae related to the genus *Antistrophus* (Ronquist et al. 2015), and this is entirely consistent  
230 with the placement of "*Aylax*" *salviae* in the UCE analysis (Blaimer et al. 2020). Another key taxon  
231 represented in our analysis but not in the UCE analysis is the single species in the recently described  
232 genus *Protobalandricus*, *P. spectabilis*, which represents a divergent sister group to all other sampled  
233 Cynipini (Nicholls, Stone & Melika 2018).

234 Importantly, by focusing on data from protein-coding genes, we can use sophisticated substitution  
235 models that accommodate variation in amino-acid profiles across sites. These models are known to  
236 resolve some issues with long-branch attraction that can affect analyses under standard models,  
237 such as those used in the UCE analysis (Kapli and Telford 2020). The most surprising UCE results do  
238 involve the placement of long, isolated lineages—the Paraulacini, Eschatocerini and Diplolepidini +  
239 Pediastpidini—so there is reason to suspect that such phenomena may be at play. Based on the  
240 results of our analysis, which largely confirm and complement the UCE results, we propose a new  
241 family-level classification of the Cynipidae. We also discuss the implications with respect to the  
242 evolutionary origin of cynipoid gall inducers and inquilines.

## 243 **Material and methods**

### 244 ***Taxon sampling***

245 Species were chosen to represent all of the currently recognized tribes of cynipid gall wasps except  
246 Rhoophilini, and we tried to cover as much of the phylogenetic diversity within each lineage as  
247 possible (Table 2). Our Cynipini selection included *Protobalandricus spectabilis*, inducing galls on  
248 *Quercus* section *Protobalanus* oaks in California. The other species came from diverse Cynipini  
249 genera: *Andricus*, *Belonocnema*, *Biorhiza*, *Druon* and *Neuroterus*. In the Aulacideini, we included two  
250 gallers of Asteraceae (*Isocolus centaureae* and *Aulacidea tavakolii*), one galler of Lamiaceae  
251 (*Hedickiana levantina*) and one galler of Papaveraceae (“*Aylax*” *hypecoi*), thus covering much of the  
252 diversity in host-plant preferences in the group. The last species, “*Aylax*” *hypecoi*, is known to belong  
253 to the Aulacideini (Ronquist et al. 2015) even though its current generic placement suggests it is an  
254 Aylacini (s. str). Its relationships are such that it will most likely have to be placed in a new genus  
255 (Nieves-Aldrey in press); here, we will consistently use quotes around the genus name to denote  
256 that it is known not to belong to *Aylax*. Our Diastrophini selection included one inquiline (*Periclistus*)  
257 and one gall inducer (*Diastrophus*), covering both of the major life history strategies in the tribe. Our  
258 Synergini (s. str.) selection was unfortunately restricted to the most species-rich genus, *Synergus*,

259 but it included both a gall inducer (*S. itoensis*) and three inquilines (*S. gifuensis*, *S. japonicus* and *S.*  
260 *umbraculus*). The remaining eight tribes were represented by single species; most of these tribes  
261 include few species and have uniform life histories (Table 1). The selection of exemplars for this  
262 study was completed before the appearance of the recent UCE study (Blaimer et al. 2020), but it  
263 does cover all major cynipid lineages detected in that analysis.

264

265 Our sampling covers the entire diversity of Figitidae (Table 2). Importantly, our selection includes  
266 *Parnips nigripes* (Parnipinae), the only gall-associated figitid whose life history is known in some  
267 detail (Ronquist et al. 2018). The Parnipinae have appeared in previous analyses as the sister group  
268 of the remaining Figitidae, or even as the sister group of the Cynipidae (Ronquist 1999; Buffington,  
269 Nylander & Heraty 2007; Ronquist et al. 2015; Blaimer et al. 2020). We also included three more  
270 distant outgroups: *Orussus abietinus* (Orussidae), *Nasonia vitripennis* (Chalcidoidea: Pteromalidae)  
271 and *Microplitis demolitor* (Braconidae: Microgastrinae) (Table 2). Of those, *O. abietinus* is the most  
272 distant (Heraty et al. 2011; Sharkey et al. 2011; Klopstein et al. 2013; Peters et al. 2017), and was  
273 used for rooting the trees generated in our analyses.

274

### 275 **Genome and transcriptome data**

276 Two publicly available transcriptomes were included for the oak gall wasp *Biorhiza pallida* (Hearn et  
277 al. 2019), and the figitid *Ganaspis species 1* (Mortimer et al. 2013). Genome assemblies for the oak  
278 gall wasps *Andricus grossulariae*, *Belonocnema kinseyi*, *Druon quercuslanigerum* and *Neuroterus*  
279 *valhalla* (Brandão-Dias et al. 2022), four species of *Synergus* (Gobbo et al. 2020), three species of the  
280 figitid genus *Leptopilina* and three outgroups (*Nasonia*, *Microplitis* and *Orussus*) were downloaded  
281 from NCBI. The remaining data consisted of genomes assembled de novo for the current study  
282 (Table 2). References to all genome and transcriptome assemblies are provided in the  
283 Supplementary Material (Table S1).

284

## 285 ***De novo genome assemblies***

286 Two protocols were followed (Supplementary Material, Table S1). For the *Andricus curvator* and *A.*  
287 *quercusramuli* assemblies, DNA was extracted from single adults using the Thermo Scientific  
288 KingFisher Cell and Tissue DNA Kit and the KingFisher Duo magnetic particle processor. Genomes  
289 were sequenced by the Swedish National Genomic Infrastructure from ChromiumX libraries (Zheng  
290 et al. 2016) on a NovaSeq6000 (NovaSeq Control Software 1.6.0/RTA v3.4.4) with a 2x151 setup  
291 using 'NovaSeqXp' workflow in 'S4' mode flow cell. The Bcl to FastQ conversion was performed using  
292 bcl2fastq\_v2.20.0.422 from the CASAVA software suite. Filtering and assembly were done by  
293 running 10X Genomics' Supernova version 2.1.0. The remaining genomes were assembled as follows.  
294 Single individuals were chosen per species, with preference for males when available, whose haploid  
295 status facilitates assembly. Paired-end sequencing libraries targeting 300 bp insert sizes were  
296 prepared using the Nextera protocol. Libraries were quality checked by Agilent bioanalyzer and  
297 Illumina Hi-seq sequenced to 150 base pairs (bp) by Edinburgh Genomics, United Kingdom.  
298 Sequencing for *Protobalandricus spectabilis* and additional sequencing for *Parnips nigripes* using  
299 Qiagen UltraLow Input libraries on an Illumina NextSeq mid-output 300-cycle run was performed at  
300 the ACRF Biomolecular Resource Facility, The John Curtin School of Medical Research, Australian  
301 National University. Raw reads were quality filtered and overlapping pairs merged in fastp (v0.20.1)  
302 (Chen et al. 2018) with default settings, and output fastq files were visually assessed for remaining  
303 adapters and other issues with Fastqc (v0.11.9) (Andrews 2010). Most genome assemblies were  
304 constructed using SPAdes (v3.14.0) (Bankevich et al. 2012) with most species run in isolate mode  
305 with coverage cutoff estimated automatically and default k-mers. Exceptions to this were  
306 *Cecinothofagus ibarraii*, *Callaspidia notata*, *Periclistus spJH-2016* and *Phaenoglyphis villosa*, which  
307 were assembled without a coverage cutoff and "*Aylax*" *hypecoi* and *Eschatocerus acacia*, which were  
308 both assembled with an additional k-mer of 99. Data for several species were first published in  
309 Hearn et al. (2019), but were re-assembled as described here for consistency (Table S1, assembly  
310 origin column). *Synergus* species genomes and the *Biorhiza pallida* and *Ganaspis species 1*

311 transcriptomes were not re-assembled here. Quality statistics for all genomes and transcriptomes  
312 are given in Supplementary Material (Table S1).

### 313 ***Gene finding***

314 To find conserved genes suitable for phylogenetic analysis, we predicted Hymenoptera and  
315 Eukaryota BUSCOs for each genome using BUSCO v4.0.6 and OrthoDB version 10 (Simão et al. 2015)  
316 for each genome and transcriptome. The Hymenoptera dataset consisted of 5,991 BUSCO groups  
317 predicted from 40 species. Lineage-specific BUSCO datasets are composed of genes present almost  
318 universally as single copy genes, although duplications within test datasets can occur (Simão et al.  
319 2015).

320 Only sequences classified as complete single copy BUSCOs were used in our analysis. A predicted  
321 BUSCO is defined as complete if its length is within two standard deviations of that BUSCO group's  
322 mean length, that is within 95% of its expected length (Simão et al. 2015; Waterhouse et al. 2018).  
323 BUSCOs were divided into categories based on the number of species in which the gene was  
324 retrieved in a complete, single copy. In total, we found 5,890 complete single-copy BUSCOs in at  
325 least one of the 37 genomes/transcriptomes (Table 3). Our phylogenetic analyses focused on the  
326 523 genes that were present in 34 or more of the 37 taxa (representing a total of 1.24 Mb of  
327 sequence data after alignment), and subsets of this dataset. The completeness of each  
328 genome/transcriptome assembly is given in Supplementary Material (Table S1).

### 329 ***Alignment and quality scoring***

330 Sequences were aligned using ClustalOmega version 1.2.4 (Sievers et al. 2011), and the alignments  
331 were filtered using Gblocks version 0.91b (Talavera and Castresana 2007), with default parameters  
332 except for gap treatment, which was set to "all" to retain more phylogenetic information (Kück et al.  
333 2010). For the purpose of phylogenetic reconstruction based on multiple genes, custom scripts were  
334 used to concatenate the desired alignments.

335 The putative quality of alignments was scored using the fraction of the total alignment length  
336 retained after Gblocks filtering. As alternative quality filtering and scoring options, we used  
337 HmmCleaner version 0.180750 (Di Franco et al. 2019) and OD-Seq version 1.22.0 (Jehl, Sievers &  
338 Higgins 2015), in the former case with and without previous Gblocks filtering, and in the latter after  
339 previous Gblocks filtering. HmmCleaner was used with default settings, OD-Seq with settings:  
340 distance\_metric = "affine", B = 1000, threshold = 0.025.

#### 341 ***Phylogenetic analysis***

342 Phylogenetic analysis was performed using IQ-Tree version 1.6.12 (Nguyen et al. 2015) and  
343 Phylobayes version 1.8 (Lartillot & Philippe 2004) using models that accommodate site-specific  
344 amino-acid profiles. Specific settings for each program are given below.

345 **IQ-Tree.** We used IQ-Tree for maximum-likelihood analyses based on the C60+I+G5 model. The C60  
346 option specifies a fast approximation of an amino-acid profile mixture model with 60 profile  
347 categories estimated from reference data (Wang et al. 2018). We modelled rate variation across  
348 sites using a mixture of invariable sites and a discrete approximation of a gamma distribution with  
349 five categories (that is, I+G5). Support values were estimated using the ultrafast bootstrap (Minh,  
350 Nguyen & von Haeseler 2013; Hoang et al. 2018) with 2,000 replicates per analysis. For each  
351 inference problem, we ran two independent analyses to confirm that phylogenetic relationships and  
352 support values were consistent. All runs used 32 CPU cores.

353 **Phylobayes.** In Phylobayes, we used the CAT F81 model. The CAT model infers the amino-acid profile  
354 for each site from the data assuming that the profiles come from a Dirichlet process mixture. We  
355 assumed that the exchangeability rates were the same (F81) rather than trying to estimate them  
356 from the data (the GTR option). Estimating the exchangeability rates was too computationally  
357 complex for the analyses we attempted, and it is not obvious that the results would be more  
358 accurate, as rare changes can be explained both by unusual amino-acid profiles and by low  
359 exchangeability rates under the CAT-GTR model, creating an identifiability problem that is

360 potentially problematic. Rate variation across sites was modelled using a discrete approximation of  
361 the gamma distribution with four categories. For each inference problem, we ran two independent  
362 Phylobayes analyses for 72 hours using the MPI version on 32 CPU cores. Convergence diagnostics  
363 and consensus trees were generated for each pair of analyses using the bpcomp program in the  
364 Phylobayes package, retaining every tenth sample and using a burn-in of 25% of samples. In all  
365 cases, the mean difference in split frequencies was less than 0.005, usually much less. The maximum  
366 difference in split frequencies was 0.09 for the analysis of the problematic 36-taxon dataset (see  
367 below), but was below 0.05 for all other analyses.

368 **Individual gene tree analysis.** As a complement to the analyses based on concatenated gene data,  
369 we also assessed node support using metrics summarising the information for individual gene trees.  
370 We used as the species tree the one based on the best third of the alignments that include at least  
371 34 of the 37 taxa inferred in PhyloBayes under the CAT-F81 model. Each individual gene tree was  
372 reconstructed using maximum-likelihood with the best-fit substitution model automatically selected  
373 by ModelFinder. First, using IQtree2 we calculated the gene concordance factor (gCF), which reflects  
374 the proportion of genes supporting a node considering uneven taxon sampling per gene (Minh, Hahn  
375 & Lanfear 2020). Second, using RAxML version 8.2.12, we calculated internode certainty (IC), which  
376 informs about the certainty of a bipartition by considering its occurrence in a set of gene trees  
377 relative to the occurrence of the second-best bipartition (Salichos and Rokas 2013).

378

### 379 ***Tree figures***

380 Illustrations of phylogenetic trees were generated using the R package ggtree version 3.2.1 (Yu et al.  
381 2017) running under R version 4.1.1.

## 382 Results

### 383 *Alignment quality and phylogenetic signal*

384 We first explored the data by analyzing the dataset that contained the 31 genes that were present in  
385 all 37 taxa (Table 2). We will refer to this as the T37-G31 dataset, for 37 taxa and 31 genes. We then  
386 successively expanded the amount of data by analyzing the T36-G123 dataset (123 genes present in  
387 36 or more taxa), T35-G296 dataset (296 genes present in 35 or more taxa) and T34-G542 datasets  
388 (542 genes present in 34 or more taxa). This series represents a trade-off between completeness in  
389 terms of taxa, and amount of genomic data included.

390 When these four datasets were analyzed with IQTree and a model accommodating site-specific  
391 amino-acid profiles (C60+I+G5), we discovered striking differences in topology (Fig. 1). In the  
392 smallest dataset (T37-G31; Fig. 1A), including only the complete alignments, *Eschatocerus*  
393 (*Eschatocerini*) diverges early in the tree. However, in the next smallest dataset (T36-G123; Fig. 1B),  
394 *Eschatocerus* is instead grouped inside the core cynipid lineages, in a clade together with  
395 *Protobalandricus* (*Cynipini*), *Phanacis* (*Phanacidini*) and *Iraella* (*Aylacini* s. str.). This is a somewhat  
396 surprising result, as it breaks the monophyly of the oak gall wasps (*Cynipini*), long presumed to be a  
397 monophyletic group. It also moves *Phanacis* (*Phanacidini*)—representing one major herb-galling  
398 clade—from a sister-group relationship with the other major herb-galling clade (*Aulacideini*) to a  
399 position within a heterogeneous collection of lineages. As more genes (and more gaps) are added,  
400 *Eschatocerus* changes again to an early-diverging position (Figs. 1C–D) but *Protobalandricus* remains  
401 outside the *Cynipini*, even though the support for this is quite poor in the largest dataset (Fig. 1D).

402 In trying to understand these results, we noted that *Eschatocerus* is a long-branch taxon, and that  
403 the three other taxa that group with *Eschatocerus* in the next smallest dataset (Fig. 1B) have three of  
404 the five most incomplete genome assemblies in terms of the number of retrieved genes  
405 (Supplementary Material, Table S2). This suggests that the clade consisting of *Eschatocerus*,



406 *Protobalandricus*, *Phanacis* and *Iraella* may be spurious and caused by long-branch attraction and/or  
407 poor or misleading gene alignments.

408 We looked at long-branch attraction first. The C60 model in IQTree is an approximation of the CAT  
409 model in PhyloBayes, and may not accurately represent site-specific amino acid profiles in cynipoids.  
410 Such deviations could potentially cause problems with long-branch attraction in our analysis. To  
411 check this possibility, we repeated the analysis of the two smallest datasets (the others were too  
412 large) in PhyloBayes using the CAT-F81 model (Fig. 2). The results were identical with those obtained  
413 with IQTree, suggesting that the topological changes are not caused by problems with the C60  
414 approximation.

415 Next, we turned our attention to alignment quality. We noted that even the relatively unrestrictive  
416 Gblocks filtering we used sometimes removed substantial portions of the alignments. If a substantial  
417 portion of an alignment is unreliable, then maybe also the part that remains after filtering is of  
418 doubtful quality? To examine this possibility, we divided the T34-G542 dataset into six  
419 approximately equal gene subsets based on the proportion of the alignments removed by Gblocks.  
420 When analyzed with IQTree under the C60+I+G5 model, the three best data subsets resulted in trees  
421 (Figs. 3A–C) that were identical to each other and to the tree from the no-gaps dataset T37-G31 (Fig.  
422 1A), except for a few minor details, most of which were not well supported. Notably, *Eschatocerus*  
423 always diverged early, Cynipini was monophyletic, and *Phanacis* grouped with Aulacideini in all these  
424 trees.

425 The results for the three worst data subsets (Figs. 3D–F) differed among themselves and from the  
426 results of the no-gaps dataset (T37-G31) in several respects, often involving aberrant placements of  
427 the four problematic taxa mentioned previously—*Eschatocerus*, *Protobalandricus*, *Phanacis* and  
428 *Iraella*—or unusual arrangements of more basal branching events, but with low support. Thus, it  
429 appears that the phylogenetic signal is consistent in the best gene alignments, that is, those that  
430 contain only small portions that are detected as problematic by the Gblocks filter.

431 To further test the effect of alignment quality, we also explored partitions of the T34-G542 dataset  
432 generated using other filtering and scoring methods. Specifically, we tried HmmCleaner, Gblocks +  
433 HmmCleaner and Gblocks + OD-Seq, and then divided the gene alignments into subsets based on  
434 how many sites were removed (HmmCleaner and Gblocks + HmmCleaner) or how many sequences  
435 (Gblock + OD-Seq) were removed by each of these pipelines. In all cases, the IQTree analyses of the  
436 highest-quality data subset or subsets resulted in trees that were identical or almost identical to the  
437 tree from the no-gaps analysis (Supplementary Material, Figs. S1–S3). OD-Seq improves the quality  
438 of alignments by removing sequences that appear to represent outliers. Thus, the quality scores are  
439 few, and it was difficult to devise criteria that generated partitions of equal size. We therefore ended  
440 up with the best partition (no sequences removed) being much smaller than the other ones  
441 (approximately 2,900 sites versus 25,600–56,800 sites), and resulting in a poorly resolved tree with  
442 some unusual features (Supplementary Material, Fig. S3A). Analysis of the next best OD-Seq  
443 partition, however, retrieved a tree that was highly similar to the no-gaps tree (compare Fig. 1A to  
444 Supplementary Material, Fig. S3B).

445 Based on these results, we conclude that it is mainly poor-quality alignments that generate the  
446 somewhat unexpected placements of *Eschatocerus*, *Protobalandricus*, *Phanacis* and *Iraella* in  
447 analyses of the T36-G123, T35-G296 and T34-G542 datasets.

#### 448 ***Long-branch attraction and gene tree discordance***

449 The tree on which all analyses of high-quality alignments converge (e.g., Figs. 3A–C) supports many  
450 previous notions of cynipid relationships. For instance, the cynipid tribes Cynipini, Diastrophini,  
451 Synergini (s. str.) and Aulacideini are all monophyletic, as is the family Figitidae, the figitid  
452 subfamilies Eucoilinae and Charipinae, and the Cynipoidea as a whole. However, somewhat  
453 surprisingly, the gall wasps themselves (Cynipidae) are not monophyletic. The Diplolepidini +  
454 Pediaspidini (represented by *Diplolepis* and *Pediaspis*) and Paraulacini (represented by  
455 *Cecinothofagus*) lineages both fall outside a core cynipid clade that apparently constitutes the sister

456 group of the Figitidae. In some analyses, the Eschatocerini (represented by *Eschatocerus*) also fall  
457 outside this clade.

458 The putative cynipid lineages that place outside the core cynipid clade, however, all represent long  
459 branches in the tree, as do the outgroup taxa. Could the non-monophyly of Cynipidae be the result  
460 of long-branch attraction, pulling isolated cynipid lineages towards the outgroups? To examine this  
461 question, we focused on a dataset consisting of the two best subsets of the T34-G542 dataset  
462 according to the Gblocks criterion, and we used PhyloBayes for the best chances of detecting long-  
463 branch attraction. The analysis of the complete taxon set resulted in the tree with non-monophyletic  
464 Cynipidae (Fig. 4A). From this dataset, we then removed in turn *Cecinothofagus*, *Eschatocerus*,  
465 outgroups, *Cecinothofagus* + *Eschatocerus*, and *Eschatocerus* + outgroups. These were the only  
466 removals of long-branch taxa that left a sufficient number of remaining lineages to test non-  
467 monophyly of Cynipidae. In all cases, the support for non-monophyletic Cynipidae remained at 100%  
468 (Figs. 4B–F). The results were almost identical when the same datasets were analyzed with IQTree  
469 (Supplementary Material, Fig. S4).

470 The gene tree concordance analysis shows that there is consistent signal across gene trees for the  
471 deep splits in the superfamily, that is, between *Cecinothofagus* and the remaining taxa, and between  
472 *Diplolepis* + *Pediaspis* on one hand and the remaining Cynipidae and Figitidae on the other  
473 (Supplementary Material, Fig. S5). This is reflected both by a positive internode certainty and a gene  
474 concordance factor > 40%. The relationships among *Eschatocerus*, remaining Cynipidae (s. str.) and  
475 Figitidae are not consistently resolved across gene trees. Similarly, this analysis indicates a fair  
476 amount of inconsistency across gene trees concerning tribal relationships within the Cynipidae (s.  
477 str.) excluding *Eschatocerus*. This could be because errors in the assemblies, errors in gene tree  
478 inference due to lack of data or biases in the simplified model used, or true inconsistencies among  
479 the gene trees. However, we did not pursue this further.

## 480 ***Phylogenetic relationships***

481 As our best phylogenomic estimate of relationships, we present the PhyloBayes (CAT-F81) analysis of  
482 the two best subsets of the T34-G542 dataset according to the Gblocks criterion (Fig. 5; see also Fig.  
483 4A and Supplementary Material, Fig. S4A). On the tree, we have indicated the currently recognized  
484 cynipid tribes, and a proposed reclassification of the family Cynipidae into three family-level taxa:  
485 the Cynipidae (s. str.) for the core cynipid clade, including Eschatocerini; the Diplolepididae for  
486 Diplolepidini + Pediaspidini; and the Paraulacidae for the Paraulacini.

487 Our results suggest that the two major tribes of herb gallers, Phanacidini and Aulacideini, form a  
488 natural group at the base of the Cynipidae (s. str.). The third tribe of herb gallers (Aylacini (s. str.)),  
489 represented in our analysis by *Iraella*, is apparently more closely related to the oak gallers (Cynipini)  
490 and the oak inquillines in the tribe Ceroptresini (represented by *Ceroptres*) than to the other herb  
491 gallers. The Aylacini (s. str.) are all associated with plants in the family Papaveraceae. The Phanacidini  
492 and Aulacideini are most commonly associated with Asteraceae and Lamiaceae but there is one  
493 species in the Aulacideini associated with Papaveraceae, "*Aylax*" *hypecoi*. This species was included  
494 in our analysis, and our results confirm that this species is not a member of Aylacini (s. str.),  
495 consistent with previous analyses (Ronquist et al. 2015).

496 The Diastrophini, represented in our analysis by *Periclistus* and *Diastrophus*, form the sister group of  
497 the clade including Cynipini + Ceroptresini + Aylacini (s. str.). It is a tribe that includes both inquillines  
498 and gall inducers associated with host plants in the family Rosaceae, mostly bushes of the genera  
499 *Rubus* and *Rosa* but also herbs in the genus *Potentilla*.

500 The tribe Qwaqwaiini, represented in our analysis by the only described species, *Qwaqwaia*  
501 *scolopiae*, appears to be the sister group of the clade formed by Synergini (s. str.) + Rhoophilini,  
502 which mostly includes inquillines in Cynipini galls and a few other insect galls. However, one of the  
503 species we analyzed, *Synergus itoensis*, represents a small subgroup within the Synergini (s. str.) of  
504 true gall inducers on oaks. This subgroup of gall inducers appears to be the sister group of the rest of

505 the Synergini in our analysis only because several early-diverging representatives are missing  
506 (Ronquist et al. 2015; Ide et al. 2018; Lobato-Vila et al. 2022). The Qwaqwaiini + (Synergini (s. str.) +  
507 Rhoophilini) apparently represent the sister group of the remaining Cynipidae (s. str.), except for the  
508 Eschatocerini. The latter tribe, represented in our analysis by the single genus *Eschatocerus*, appears  
509 to be the sister group of all other Cynipidae (s. str.). Occasionally, we retrieved *Eschatocerus* as the  
510 sister group of remaining Cynipidae (s. str.) + Figitidae (Fig. 3B, Supplementary Material, Figs. S2A–B,  
511 S3B) or only Figitidae (Supplementary Material, Fig. S1B), although with unconvincing support  
512 values. Thus, we conclude that the tribe Eschatocerini likely belongs to the Cynipidae (s. str.).

513 The Figitidae in our analyses form a strongly supported monophyletic group. The subfamily  
514 Parnipinae, represented in our analysis by the single genus *Parnips*, appears as the sister group of  
515 the remaining lineages. It is a parasitoid of cynipid gall inducers in the tribe Aylacini (s. str.). The  
516 Charipinae, represented by *Phaenoglyphis* and *Alloxysta* in our analysis, form a monophyletic group.  
517 They are hyperparasitoids of other parasitic wasps attacking aphids. The remaining Figitidae  
518 apparently form a monophyletic group, falling into two subgroups: the Aspicerinae (Callaspidia) and  
519 the Eucoilinae (the remaining species). Both subfamilies are parasitoids of Diptera larvae.

520 Among the more early-diverging cynipoid lineages, the Diplolepidini, represented by *Diplolepis*, and  
521 the Pediaspidini, represented by *Pediaspis*, form a strongly supported clade, which appears to be the  
522 sister group of Figitidae + Cynipidae (s. str.). We propose here that this clade be recognized as a  
523 separate family, the Diplolepididae (Fig. 5).

524 Finally, our results support the conclusion that the Paraulacini (represented by *Cecinothofagus*) form  
525 the sister group of the remaining cynipoid lineages. We propose here that also this clade be  
526 recognized as a separate family, the Paraulacidae (Fig. 5). The new classification is discussed in more  
527 detail in the Taxonomy section below.

528 ***Evolutionary implications***

529 Our analysis includes too few exemplars to allow a rigorous statistical analysis of different scenarios  
530 for the origin of cynipoid gall inducers and inquilines, but we illustrate some of the possibilities (Figs.  
531 6, 7). When it comes to the origin of the phytophagous lineages (inquilines and gall inducers), two  
532 main alternative scenarios seem plausible.

533 One scenario (independent phytophagy) assumes that the Paraulacidae and Parnipinae life histories  
534 trace back to the ancestral cynipoid (Fig. 6A). If so, then phytophagous inquilines or gall inducers  
535 must have originated twice from such ancestors. The other scenario (parasitoid reversal) assumes  
536 instead that it is the phytophagous habit that traces back to the cynipoid ancestor (Fig. 6B). Then  
537 koinobiont endoparasitoids must have evolved twice independently from phytophagous ancestors.  
538 Intermediates between these extremes are also possible; for instance, gall inducers and koinobiont  
539 endoparasitoids might both have evolved twice independently from ancestors that were  
540 ectoparasitoids of gall-inducing insects.

541 Inferring the evolutionary transitions between inquilines and gall inducers is even more complicated.  
542 We present two extreme scenarios. If all gall inducers evolved from inquilines (inquilines-first  
543 scenario), then our results show that gall inducers must have evolved at least six times  
544 independently (Fig. 7A). If additional evidence on the phylogeny of Diastrophini (Ronquist et al.  
545 2015) is taken into account, this increases to seven. At the other extreme, if all inquilines evolved  
546 from gall inducers (gallers-first scenario) our results taken at face value suggest three transitions  
547 (Fig. 7B). However, the gall-inducing *Synergus* lineage is deeply nested within inquiline lineages (Ide  
548 et al. 2018; Lobato-Vila et al. 2022), and several additional, independent origins of inquilines would  
549 be required if the gall-inducing habit of this lineage is ancestral. If we also consider inquilines in the  
550 Diastrophini (Ronquist et al. 2015), then there would have been at least ten independent origins of  
551 inquiline cynipids from gall inducers. Of course, intermediate scenarios involving transitions in both

552 directions are possible, even though there is no simple solution with only few switches between the  
553 two life histories.

## 554 **Taxonomy**

### 555 *Taxonomy*

556 Given that our results provide solid and independent confirmation of the results from the UCE  
557 analysis (Blaimer et al. 2020) regarding the non-monophyly of Cynipidae, we find it appropriate to  
558 revise the family-level classification to reflect these findings here. As the circumscription of the 13  
559 cynipid tribes and potential apomorphies characterizing each of them have been discussed at length  
560 previously (Ronquist et al. 2015; Lobato-Vila et al. 2022), we just give a brief formal synopsis of the  
561 proposed family classification here. The synopsis does not include the fossil family-level taxa, the  
562 phylogenetic position of which must be carefully re-evaluated in light of the phylogenomic findings.  
563 We refrain from revising the classification of the non-cynipid family-level taxa in the Cynipoidea, as  
564 the results of the UCE analysis on Liopteridae, Ibaliidae and some Figitidae lineages still await  
565 independent confirmation.

566

567 **Paraulacidae Nieves-Aldrey and Liljeblad, stat. prom.** [ZooBank identifier to be inserted upon  
568 acceptance] Type genus *Paraulax* Kieffer, 1904

569 Paraulacini Nieves-Aldrey and Liljeblad, 2009.

570

571 **Circumscription:** The family includes the genera *Paraulax* and *Cecinothofagus*, each with three  
572 species. Southern South America, found only in the temperate *Nothofagus* forests of Chile and  
573 Argentina.

574 **Comments:** A set of unique morphological features allow easy differentiation of Paraulacidae from  
575 Cynipidae and other families in Cynipoidea (Ronquist et al. 2015). Two unique autapomorphies can  
576 be emphasized: the presence of 5-9 vertical carinae in the ventral region of the gena; and the  
577 profemur with the basal third swollen and carrying a structure of 4-5 rows of sharp, closely spaced  
578 and deep costulae. The Paraulacidae appear to be parasitoids of gall inducing chalcidoids of the  
579 genus *Aditrochus* on species of *Nothofagus* (Nothofagaceae) (Rasplus, Nieves-Aldrey & Cruaud  
580 2022).

581

582 **Diplolepididae Latreille, 1802, stat. prom.** [ZooBank identifier to be inserted upon acceptance].

583 Type genus *Diplolepis* Geoffroy, 1762. Conserved (see Kerzhner 1991).

584 Diplolepariae Latreille, 1802. Corrected to Diplolepididae.

585 Rhoditini Hartig, 1840.

586 Diplolepidini Latreille (Ronquist 1999)

587

588 **Circumscription:** Includes two tribes, Diplolepidini and Pediaspidini.

589 Diplolepidini Latreille, 1802. Two genera, *Diplolepis* Geoffroy with 51 species and *Liebelia* Kieffer  
590 with 10 species. Holarctic.

591 Pediaspidini Ashmead, 1903. Two genera, *Pediaspis* and *Himalocynips*, with one species each.

592 Palaeartic.

593



594 **Comments:** *Himalocynips*, a genus with a single species that was described within its own subfamily  
595 (*Himalocynipinae* Yoshimoto, 1970) was included within the *Pediaspidini* by Ronquist (1999). Its  
596 phylogenetic proximity to *Pediaspis* was later supported by a morphological phylogenetic analysis  
597 (Liljeblad et al. 2008). The biology and host plant of this species are however unknown, although it  
598 may (as for *Pediaspis*) be a galler on *Acer* (Sapindaceae). We were unable to include this rare and  
599 poorly studied species in our analysis, and a molecular confirmation of its placement within the  
600 *Pediaspidini* and the *Diplolepididae* is an obvious priority for future studies.

601 Putative morphological apomorphies for the *Diplolepidini* include the ploughshare-shaped  
602 hypopygium, the broad and crenulate mesopleural impression, and the lack of lateral propodeal  
603 carinae (Ronquist et al. 2015). However, quantitative analyses have struggled to identify unique or  
604 distinct apomorphies for the tribe, partly because of variation among the constituent taxa, and  
605 partly because of the previous difficulties in resolving relationships among cynipid tribes (Ronquist et  
606 al. 2015). The *Pediaspidini* are characterized by several unique or distinct apomorphies, among them  
607 the posteromedian scutellar impression (Ronquist et al. 2015). Potential apomorphies of the  
608 *Diplolepididae* include the faint or absent scutellar foveae and the female antenna having 12 or  
609 more flagellomeres (Ronquist et al. 2015; couplet 3 in the key to cynipid tribes). A quantitative  
610 analysis of the available morphological and biological evidence for *Diplolepididae* monophyly is still  
611 missing. Before such an analysis is attempted, however, it would be valuable to reassess the  
612 morphological evidence in the light of the phylogenomic results. It is clear that such an analysis  
613 would have to span all major cynipoid lineages, and not be restricted to the former cynipid groups.

614 We refrain from elevating the *Diplolepidini* and *Pediaspidini* to subfamily status, as we think it is  
615 likely that further study of the Eastern Palearctic fauna will reveal additional divergent lineages  
616 within the family.

617

618 **Cynipidae (s. str.)**

619 Cynipsera Latreille, 1802. Corrected to Cynipidae. Type genus: *Cynips*.

620

621 **Circumscription:** As here proposed, the family includes the tribes Eschatocerini, Phanacidini,  
622 Aulacideini, Qwaqwaiini, Synergini, Rhoophilini, Diastrophini, Aylacini, Ceroptresini and Cynipini.

623

624 **Comments:** The position of the Eschatocerini is still highly uncertain, and its life history is also poorly  
625 studied. Future studies will have to show whether it truly belongs to the Cynipidae (s. str.), or  
626 elsewhere in the Cynipoidea, probably then as a separate family. The potential apomorphies of each  
627 of the remaining tribes have been analyzed previously (Ronquist et al. 2015), although it would be  
628 valuable to reassess the morphological and biological evidence and reanalyze it in the light of the  
629 new phylogenomic results. The same applies to potential apomorphies for the Cynipidae (s. str.). In  
630 the latter case, there are no known apomorphies at present.

631 Although there is growing evidence that the Phanacidini and Aulacideini are sister groups, we prefer  
632 to keep them as separate tribes (in contrast to Blaimer et al. 2020), as there are distinct biological  
633 and morphological differences between the groups. The Phanacidini tend to be small and elongate  
634 species, and most of them are stem galls. The Aulacideini tend to be larger and their body form is  
635 more rounded. They usually induce galls in other plant parts.

636 Although one could argue for the grouping of tribes within the Cynipidae (s. str.) into subfamilies, we  
637 consider it premature to do so at the current time. In particular, it would be advantageous if the  
638 position of the Eschatocerini could be determined unambiguously before further refinement of the  
639 classification is considered.

## 640 **Discussion**

### 641 ***Alignment quality and phylogenetic signal***

642 Assembling genomes or transcriptomes from short sequence reads and finding single-copy orthologs  
643 in those assemblies are challenging tasks. Thus, one might expect some variation in the quality of the  
644 resulting gene datasets. There is a plethora of tools for aligning the gene sequences in those  
645 datasets, and for filtering out alignment sites or sequences that may provide noisy or misleading  
646 phylogenetic signal. Nevertheless, it may be difficult to eliminate such data issues. Our phylogenetic  
647 results varied depending on which gene alignments were included but were consistent for the high-  
648 quality alignments, regardless of method used to identify the latter (alignment completeness,  
649 Gblocks results, HmmCleaner results, Gblocks + HmmCleaner results, or Gblocks + Od-Seq results).  
650 This suggests that we had problems with misleading phylogenetic signal in poor alignments, rather  
651 than true conflict between different gene trees. This is also supported by the fact that the four taxa  
652 that were apparently incorrectly grouped together in analyses including poor alignments  
653 (*Eschatocerus*, *Iraella*, *Phanacis* and *Protobalandricus*) also were represented by some of the most  
654 incomplete genome assemblies. It is interesting to note that the taxa represented by transcriptomes  
655 (*Biorhiza* and *Ganaspis*) were not affected by similar problems with unstable phylogenetic  
656 placements, despite the rather incomplete representation of the genome in these transcriptomes  
657 (Supplementary Material, Table S2). This, too, supports the conclusion that some alignments  
658 included misleading phylogenetic signal from poor-quality genome assemblies, and gives some  
659 confidence in the tree resulting from analysis of the high-quality alignments.

660 Interestingly, our results also suggest that quality filtering tools, such as the ones we tested (Gblocks,  
661 HmmCleaner and OD-seq), are better at identifying problem alignments than they are at filtering out  
662 erroneous or misleading sites and sequences. None of these tools were able to remove the  
663 misleading phylogenetic signal from the poor alignments, although they might have had some  
664 positive effect.

665 The ultimate cause of the discordant phylogenetic signal remains unclear. The four problematic taxa  
666 may group together in some analyses simply because they share divergent or incorrect sequences  
667 for some genes. The signal could be entirely erroneous - for example through sharing of specific  
668 gene pairs that can easily be merged into chimeric sequences in challenging genome assemblies,  
669 resulting in positively misleading phylogenetic signal that groups them together.

670 As several alternative approaches to filtering out poor gene alignments gave consistent end results,  
671 we are fairly confident that our phylogenetic analysis is not misled by erroneous genome assemblies.  
672 It is more difficult to exclude the possibility of shortcomings in the substitution model used for  
673 probabilistic inference resulting in artificial long branch attraction. Resolving cynipoid relationships  
674 involves determining the branching order of several long branch taxa (i.e., groups linked to other  
675 members of the taxon set by a long, non-dividing branch inserting deep in the phylogeny), including  
676 the Eschatocerini, Paraulacidae and Diplolepididae. The problem is accentuated by the long  
677 evolutionary distance between known cynipoid and outgroup genomes. By using models that  
678 accommodate among-site variation in amino-acid profiles, we applied some of the best available  
679 tools for resolving long-branch attraction due to model shortcomings (Kapli and Telford 2020). We  
680 also note that removal of long-branch taxa in various combinations revealed no sign of an alternative  
681 phylogenetic signal obscured by long-branch attraction effects (Fig. 4).

### 682 ***Phylogenetic relationships***

683 The phylogenetic results from our analysis are largely congruent with and complement those of the  
684 earlier UCE analysis (Blaimer et al. 2020). Here we highlight the major agreements and  
685 disagreements between these two phylogenomic studies.

686 (i) *Division of Cynipidae into 3 families and placement of Eschatocerini*. Both studies support division  
687 of the Cynipidae into three separate lineages—recognized here as the families Paraulacidae,  
688 Diplolepididae and Cynipidae (s. str.). However, the evidence on the placement of Eschatocerini is  
689 slightly different. Our analysis suggests that the Eschatocerini belong to the Cynipidae (s. str),

690 forming the sister-group of the remaining lineages in that clade, while the UCE analysis favored a  
691 sister-group relationship between the Eschatocerini and Figitidae. As the *Eschatocerus* genome  
692 assembly is one of the least complete in our study, further genomic sequencing of this taxon would  
693 be highly desirable.

694 (ii) *Rejection of monophyly of cynipid herb gallers*. Our study provides even stronger support for the  
695 conclusion of the UCE analysis (Blaimer et al. 2020) that the herb-galling clade of Aulacideini +  
696 Phanacidini is monophyletic. Both analyses are consistent with previous studies suggesting that  
697 these two tribes are reciprocally monophyletic (Liljeblad & Ronquist 1998; Ronquist et al. 2015).  
698 Unlike Blaimer et al. (2020), we prefer to keep the tribes Aulacideini and Phanacidini separate until  
699 there is evidence that this would conflict with phylogenetic relationships.

700 Blaimer et al. (2020) also concluded that the cynipid herb gallers (apart from a few species in the  
701 tribe Diastrophini) form a monophyletic clade, Aylacini (s. lat.), which is the sister group of all  
702 remaining Cynipidae (s. str.). As mentioned above, this interpretation is based on the incorrect  
703 assumption that *Neaylax salviae* (which they name *Aylax salviae*) belongs to the Aylacini (s. str.). In  
704 fact, this species belongs to a clade of Lamiaceae gallers in the Aulacideini (Ronquist et al. 2015), and  
705 is unrelated to the true Aylacini (s. str.), all known species of which are associated with poppies  
706 (Papaveraceae). Our study is the first phylogenomic analysis to include a true representative of the  
707 Aylacini (s. str.), *Iraella hispanica*, and our analysis clearly shows that herb gallers in Aylacini (s. str.)  
708 and in Aulacideini + Phanacidini are phylogenetically divergent. Instead, Aylacini (s. str.) is deeply  
709 nested within the sister-group of Aulacideini + Phanacidini, a clade that is dominated by inquilines  
710 and gall inducers associated with woody rosids (the only exception being a few species of  
711 Diastrophini that are gallers of herbs in the genus *Potentilla*). Thus, galling of herbs in the family  
712 Papaveraceae by the Aylacini (s. str.) appears to be secondary. Our results are consistent with  
713 several earlier analyses suggesting that the Aylacini (s. str.) form a lineage that is distinct from that  
714 of the Aulacideini and Phanacidini (Liljeblad & Ronquist 1998; Nylander et al. 2004; Ronquist et al.

715 2015), and they agree with preliminary analyses of a recent genome assembly of *Aylax minor*,  
716 another member of the Aylacini (s. str.) (AB, unpublished data).

717 (iii) *Phylogenetic placement of the Qwaqwaiini*. Ours is the first phylogenomic analysis to include the  
718 Qwaqwaiini. Our analysis places *Qwaqwaiia scolopiae*, the only known species in the Qwaqwaiini, as  
719 the sister group of the inquiline clade consisting of Synergini (s. str.) + Rhoophilini. This is intriguing  
720 because, like the Qwaqwaiini, the Rhoophilini are from South Africa. To date these are the only two  
721 indigenous species of Cynipidae (s. str.) known from the afrotropical zone. This could potentially  
722 suggest an afrotropical origin for this clade.

723 (iv) *Relationships in Figitidae*. Our sampling of Figitidae is not as extensive as Blaimer et al.'s UCE  
724 analysis, but our results are entirely consistent for all taxa that overlap. In both analyses, the  
725 Parnipinae is the sister-group to all other Figitidae, the Charipinae (*Phaenoglyphis* and *Alloxysta* in  
726 our analysis) are monophyletic, the Diptera-associated lineages (Aspicerinae (*Callaspidia*) and  
727 Eucoilinae (*Ganaspis* and *Leptopilina*) in our analysis) form a monophyletic group, and the Eucoilinae  
728 are monophyletic. As our analysis did not include any representatives of Liopteridae and Ibalidae,  
729 we cannot comment on their placement. Neither our analysis nor any other molecular phylogenetic  
730 analysis has yet included representatives of the rare Australian Austrocynipidae, which is assumed to  
731 be the sister group of all other cynipoids (Ronquist 1995, 1999).

### 732 ***Evolutionary implications***

733 **Transitions between phytophagous and parasitoid lifecycles**. The phylogenomic results suggest two  
734 alternative scenarios for the origin of gall inducers and inquilines from insect-parasitic ancestors (Fig.  
735 6). Superficially, it may appear more likely that the phytophagous forms evolved once, and that  
736 figitids secondarily reverted to an insect-parasitic life history (Fig. 6B). If so, and given that  
737 Paraulacidae are koinobiont endoparasitoids of gall-inducing insects, then adaptations to this  
738 specialized mode of parasitism must have evolved separately in the Paraulacidae and Figitidae. The  
739 alternative hypothesis requires independent origins of herbivory (inquilinism/gall-induction) in the

740 Diplolepididae and Cynipidae (s. str.) from parasitoids of gall insects (Fig. 6A). Assessing which of  
741 these patterns of transition is most probable requires that we weight the relative probabilities of the  
742 alternative state changes. Such weighting requires more information than currently available.  
743 Interestingly, both Diplolepididae and Cynipidae include species whose genomes encode plant cell  
744 wall degrading enzyme genes (Hearn et al. 2019). These may have been acquired from an  
745 herbivorous shared common ancestor, or alternatively they may be essential components of cynipid  
746 herbivory that have been acquired convergently during independent evolution of galling lifestyles.  
747 Analyses of whether such complex genomic features associated with the two different life histories  
748 are likely to have a shared history or separate origins provides one of the most promising ways of  
749 distinguishing between the two possible scenarios.

750 Discrimination between the alternative hypotheses shown in Figs. 6A and B is made more difficult by  
751 uncertainty regarding the biologies of some of the taxa involved. It would be good to have additional  
752 data confirming that the Paraulacidae are indeed koinobiont endoparasitoids, and identifying the  
753 *Eschatocerini* as true gall inducers, inquilines or parasitoids. Demonstration of herbivory for  
754 *Eschatocerus* (as we have assumed in Fig. 6) would strengthen support for herbivory as a basal state  
755 in Cynipidae+Figitidae followed by reversal to a parasitoid lifecycle in Figitidae (Fig. 6B). On the other  
756 hand, if *Eschatocerus* were shown to be koinobiont parasitoids of other gall inhabitants, this would  
757 further strengthen the independent phytophagy scenario (Fig. 6A).

758 **Transitions between gall inducing and inquiline lifecycles.** Whichever of our two hypotheses (gall  
759 inducers first, or inquilines first) is correct, the history of transitions between inquilinism and gall  
760 induction is clearly more complex than the origin of phytophagy. The only transition that is clearly  
761 supported by phylogenetic evidence at this point is the origin of gall induction by *Synergus itoensis*  
762 and close relatives from inquiline ancestry within the Synergini (Ide et al. 2018). If we assume that  
763 transitions have always been from inquilinism to gall induction in the Cynipidae (s. str.), then the  
764 inquilines-first scenario appears slightly more likely (Fig. 7A). However, if we assume (as seems most

765 likely) that gall induction in the *S. itoensis* lineage represents reversal from an inquiline life cycle,  
766 then the gallers-first scenario (Fig. 7B) provides a more parsimonious explanation of the remaining  
767 transitions. Which hypothesis is better supported depends crucially on the relative ease (in  
768 evolutionary terms) or weight (in terms of inferred state changes) of transitions between the  
769 alternative states of gall induction and inquiline lifecycles (Stone & French 2003). While both gall  
770 inducers and inquiline cynipids can cause the development of nutritive gall tissues on which the  
771 larvae feed, only true inducers can cause the development of gall tissues *de novo*, and the  
772 development of the structurally complex outer gall tissues that characterize many cynipid galls. If it  
773 is easier to transition from full gall induction to a simpler inquiline life history than *vice versa*, then a  
774 gallers-first scenario may be more likely *a priori*. Alternatively, it might be a relatively minor step in  
775 evolutionary terms for cynipids to transition from inquilinism to becoming a gall inducer. We  
776 currently know too little about the differences between these alternative life histories to provide any  
777 clear weighting of transition probabilities between them, beyond suspecting that unweighted  
778 parsimony may be an unreliable guide. While the evolution of gall induction in *Synergus itoensis*  
779 shows that gall induction can evolve from inquilinism, the galls they induce consist only of nutritive  
780 tissues and lack morphologically complex non-nutritive tissues. Some Synergini inquilines do modify  
781 the complex gall morphology of host galls usurped at a very early stage in their development (Pérez  
782 et al. 2009), but no case is yet known of a shift from inquilinism to gall induction that also includes  
783 ability to induce complex gall phenotypes.

784 Again, the life history of some key taxa is important in weighing these alternative scenarios.  
785 Demonstration that Eschatocerini are inquilines would strengthen the inquilines-first scenario, while  
786 demonstration that they are true gall inducers would strengthen support for the gallers-first  
787 scenario. The Qwaqwaiini is another taxon for which more detailed life-history information would be  
788 valuable. According to the only existing report it is a gall inducer (Liljeblad et al. 2011), but it remains  
789 possible that it could be an inquiline, like most members of the Synergini (s. str.) + Rhoophilini, of  
790 which we infer it to be the sister group. Such a demonstration would strengthen support for the



791 inquilines-first scenario by removing one of the independent origins of gall inducers. Finally, we note  
792 that an ancestral state for inquilinism in Cynipidae (s. str.) also requires that the ancestral host was  
793 not itself a cynipid gall inducer. While rare examples of inquiline cynipids developing in non-cynipid  
794 galls are known (Askew 1999; van Noort et al. 2007), it is notable that the vast majority of inquiline  
795 cynipids develop in cynipid galls.

796 Transitions between strikingly different life histories, such as those between koinobiont  
797 endoparasitoids, gall inducers and inquilines in cynipoids, should have major effects on genomes.  
798 For instance, transitions to or from a koinobiont endoparasitic life history should involve recruitment  
799 or loss of a swathe of genes or gene functions associated, for example, with suppressing or evading  
800 host immune systems, maintaining basic physiological functions within a host body, and adjusting  
801 larval development and feeding patterns so that the host larva survives and develops normally as  
802 long as possible. This should be noticeable as an unusual number of protein-coding genes with  
803 markedly increased or decreased rates of non-synonymous rates of evolution along branches of the  
804 phylogeny involving life history changes. Similarly, the genes undergoing unusual amounts of change  
805 should also belong to particular functional categories. Transitions between gall inducers and  
806 inquilines may be less dramatic but should nevertheless leave similar genomic signatures. A recent  
807 study suggests that this is indeed the case for the transition from inquilines to gall inducers in  
808 species related to *Synergus itoensis* (Gobbo et al. 2020). Whether such genomic signatures of life  
809 history transitions can be detected deeper down in the cynipoid tree remains unclear. However, this  
810 is clearly a possibility that is well worth investigating, and the genomic data reported here  
811 represents a first step in supporting such a line of research.

## 812 **Acknowledgements**

813 We would like to thank Jean-Yves Rasplus and Astrid Cruaud for their willingness to share barcoding  
814 and UCE data providing critical clues to the life history of *Cecinothofagus* prior to publication. Jean-  
815 Yves Rasplus also provided valuable comments on the manuscript.

## 816 **Funding**

817 Support for genome sequencing was obtained from the National Genomics Infrastructure and  
818 Science for Life Laboratory (Project ID P14912). For computation, we used resources from the  
819 Swedish National Infrastructure for Computing at UPPMAX (projects 2017/7-283 and 2017097) and  
820 at NSC (projects 2021/5-118 and 2021/23-157), partially funded by the Swedish Research Council  
821 (2018-05973). Additional support was obtained from the European Union's Horizon 2020 research  
822 and innovation program, Marie Skłodowska Curie Actions (642241 to E.G. and F.R.); the Swedish  
823 Research Council (2018-04620 to F.R.); the UK Natural Environment Research Council (NE/J010499  
824 and NBAF375 to G.N.S); the French National Research Agency (ANR-15-CE12-0010-01/DASIRE to N.L.  
825 and ANR-19-CE02-0008 to A.B.). J.L.N.A. was supported by the research project MINECO/FEDER, UE  
826 CGL2015-66571-P.

## 827 **Conflict of interest**

828 The authors declare no conflicts of interest.

## 829 **Author contributions**

830 G.N.S. and J.H. conceived the study. J.H., J.A.N., G.K. and E.G. sequenced genomes. J.H. and E.G.  
831 assembled genomes and generated gene alignments. E.G., F.R., N.L. and A.B. designed and  
832 performed phylogenetic analyses. J.L.N.A. contributed material, life-history information and  
833 taxonomic discussion. E.G., G.N.S., J.H. and F.R. wrote the first draft of the manuscript. The final  
834 manuscript was a joint effort.

## 835 **Data availability**

836 Raw sequencing data is available under EBI Bioprojects PRJEB13424, PRJEB45812, PRJEB51101 and  
837 PRJEB37996. Scripts, datasets, and result files are available from  
838 [https://github.com/ronquistlab/cynipoid\\_phylogenomics](https://github.com/ronquistlab/cynipoid_phylogenomics).

## 839 References

- 840 Abe Y, Ide T, Wachi N. 2011. Discovery of a new gall-inducing species in the inquiline tribe Synergini  
841 (Hymenoptera: Cynipidae): inconsistent implications from biology and morphology. *Annals of*  
842 *the Entomological Society of America* 104: 115–20. <https://doi.org/10.1603/AN10149>.
- 843 Andrews S. 2010. *FastQC: A Quality Control Application for High Throughput Sequence Data*.  
844 Available at <http://www.bioinformatics.babraham.ac.uk/projects/fastqc>.
- 845 Aranda-Rickett A, Rothen C, Diez P, Gonzalez A, Marazzi B. 2017. Sugary secretions of wasp galls: a  
846 want-to-be extrafloral nectar? *Annals of Botany* 120: 765–774.  
847 <https://doi.org/10.1093/aob/mcx075>.
- 848 Ashmead WH. 1903. Classification of the gall-wasps and parasitic cynipoids, or the superfamily  
849 Cynipoidea. *Psyche (Cambridge)* 10: 210–215.
- 850 Askew, RR. 1999. Confirmation of an association of *Synergus* Hartig and *Saphonecrus* Dalla Torre  
851 and Kieffer (Hym., Cynipidae) with oak galls of Cecidomyiidae (Dipt.). *Entomologist's*  
852 *Monthly Magazine*, 135: 89–90.
- 853 Bankevich A, Nurk S, Antipov D, Gurevich AA, Dvorkin M, Kulikov AS, Lesin VM et al. 2012. SPAdes: a  
854 new genome assembly algorithm and its applications to single-cell sequencing. *Journal of*  
855 *Computational Biology* 19: 455–77. <https://doi.org/10.1089/cmb.2012.0021>.
- 856 Blaimer BB, Gotzek D, Brady SG, Buffington ML. 2020. Comprehensive phylogenomic analyses re-  
857 write the evolution of parasitism within cynipoid wasps. *BMC Evolutionary Biology* 20: 155.  
858 <https://doi.org/10.1186/s12862-020-01716-2>.
- 859 Blair KG. 1949. *Ceroptres arator* Hartig (Hym., Cynipidae): inquiline or parasite? *Entomologist's*  
860 *Monthly Magazine* 85: 254–255.
- 861 Brandão-Dias PFP, Zhang YM, Pirro S, Vinson CC, Weinersmith KL, Ward AKG, Forbes AA, Egan SP.  
862 2022. Describing biodiversity in the genomics era: a new species of Nearctic Cynipidae gall  
863 wasp and its genome. *Systematic Entomology* 47: 94–112.
- 864 Buffington M. L. 2008. A revision of Australian Thrasorinae (Hymenoptera: Figitidae) with a  
865 description of a new genus and six new species. *Australian journal of entomology* 47: 203–  
866 212.
- 867 Buffington ML, Brady SG, Morita SI, van Noort S. 2012. Divergence estimates and early evolutionary  
868 history of Figitidae (Hymenoptera: Cynipoidea). *Systematic Entomology* 37: 287–304.  
869 <https://doi.org/10.1111/j.1365-3113.2012.00617.x>
- 870 Buffington ML, Liljeblad J. 2008. The description of Euceroptinae, a new subfamily of Figitidae  
871 (Hymenoptera), including a revision of Euceroptres Ashmead, 1896 and the description of a  
872 new species. *Journal of Hymenoptera Research*. 17 (1): 44-56.
- 873 Buffington ML, Nieves-Aldrey J L. 2011. Revision of Plectocynipinae (Hymenoptera: Figitidae) with  
874 descriptions of a new genus and three new species from Chile. *Proceedings of the*  
875 *Entomological Society of Washington*, 113(2): 91-108.
- 876 Buffington ML, Nylander JAA, Heraty JM. 2007. The phylogeny and evolution of Figitidae  
877 (Hymenoptera: Cynipoidea). *Cladistics* 23: 403–431. [https://doi.org/10.1111/j.1096-](https://doi.org/10.1111/j.1096-0031.2007.00153.x)  
878 0031.2007.00153.x
- 879 Cambier S, Ginis O, Moreau SJM, Gayral P, Hearn J, Stone GN, Giron D, Huguet E, Drezen JM. 2019.  
880 Gall wasp transcriptomes unravel potential effectors involved in molecular dialogues with oak  
881 and rose. *Frontiers in Physiology* 10: 926. <https://doi.org/10.3389/fphys.2019.00926>.
- 882 Chen S, Zhou Y, Chen Y, Gu J. 2018. Fastp: an ultra-fast all-in-one FASTQ preprocessor. *Bioinformatics*  
883 34: i884–90. <https://doi.org/10.1093/bioinformatics/bty560>.
- 884 Cornell HV. 1983. The secondary chemistry and complex morphology of galls formed by the  
885 Cynipinae (Hymenoptera): why and how? *American Midland Naturalist* 110: 225–234.  
886 <https://doi.org/10.2307/2425263>.
- 887 Di Franco A, Poujol R, Baurain D, Philippe H. 2019. Evaluating the usefulness of alignment filtering  
888 methods to reduce the impact of errors on evolutionary Inferences. *BMC Evolutionary Biology*

- 889 19: 21. <https://doi.org/10.1186/s12862-019-1350-2>.
- 890 Geoffroy EL. 1762. *Histoire abrégée des insectes qui se trouvent aux environs de Paris, dans laquelle*  
891 *ces animaux sont rangés suivant un ordre méthodique, Tome second*. Paris: Durand, 690 pp.,  
892 pls. 11-22.
- 893 Gobbo E, Lartillot N, Hearn J, Stone GN, Abe Y, Wheat CW, Ide T, Ronquist F. 2020. From inquilines to  
894 gall inducers: genomic signature of a life-style transition in *Synergus* gall wasps. *Genome*  
895 *Biology and Evolution* 12: 2060–73. <https://doi.org/10.1093/gbe/evaa204>.
- 896 Harper LJ, Schönrogge K, Lim KY, Francis P, Lichtenstein CP. 2004. Cynipid galls: insect-induced  
897 modifications of plant development create novel plant organs. *Plant, Cell & Environment* 27:  
898 327–335. <https://doi.org/10.1046/j.1365-3040.2004.01145.x>.
- 899 Harris MO, Pitzschke A. 2020. Plants make galls to accommodate foreigners: some are friends, most  
900 are foes. *New Phytologist* 225:1852–1872. <https://doi.org/10.1111/nph.16340>.
- 901 Hartig T. 1840 Über die Familie der Gallwespen. *Zeitschrift für Entomologie(Germar)* 2: 176–209.
- 902 Hearn J, Blaxter M, Schönrogge K, Nieves-Aldrey JL, Pujade-Villar J, Huguet E, Drezen J-M,  
903 Shorthouse JD, Stone GN. 2019. Genomic dissection of an extended phenotype: oak galling by  
904 a cynipid gall wasp. *PLoS Genetics* 15: e1008398.  
905 <https://doi.org/10.1371/journal.pgen.1008398>.
- 906 Heraty J, Ronquist F, Carpenter JM, Hawks D, Schulmeister S, Dowling AP, Murray D, et al. 2011.  
907 Evolution of the hymenopteran megaradiation. *Molecular Phylogenetics and Evolution* 60: 73–  
908 88. <https://doi.org/10.1016/j.ympev.2011.04.003>.
- 909 Hoang DT, Chernomor O, von Haeseler A, Minh BQ, Vinh LS. 2018. UFBoot2: improving the ultrafast  
910 bootstrap approximation. *Molecular Biology and Evolution* 35: 518–22.  
911 <https://doi.org/10.1093/molbev/msx281>.
- 912 Ide T, Kusumi J, Miura K, Abe Y. 2018. Gall Inducers arose from inquilines: phylogenetic position of a  
913 gall-inducing species and its relatives in the inquiline tribe Synergini (Hymenoptera:  
914 Cynipidae). *Annals of the Entomological Society of America* 111: 6–12.  
915 <https://doi.org/10.1093/aesa/sax065>.
- 916 Jehl P, Sievers F, Higgins DG. 2015. OD-Seq: outlier detection in multiple sequence alignments. *BMC*  
917 *Bioinformatics* 16: 269. <https://doi.org/10.1186/s12859-015-0702-1>.
- 918 Kapli P, Telford MJ. 2020. Topology-dependent asymmetry in systematic errors affects phylogenetic  
919 placement of Ctenophora and Xenacoelomorpha. *Science Advances* 6: eabc5162.  
920 <https://doi.org/10.1126/sciadv.abc5162>
- 921 Kerzhner IC. 1991. Case 2292 Histoire abregee des insectes qui se trouvent aux environs de Paris  
922 (Geoffroy, 1762): proposed conservation of some generic names (Crustacea and Insecta).  
923 *Bulletin of Zoological Nomenclature* 48: 2.
- 924 Kieffer JJ. 1904. Description de quelques Cynipides exotiques dont l'un forme un genre nouveau.  
925 *Bulletin de la Société d'Histoire Naturelle de Metz* 23: 59–66.
- 926 Kinsey AC. 1920. Phylogeny of cynipid genera and biological characteristics. *Bulletin of the American*  
927 *Museum of Natural History* 42: 357–402
- 928 Klopstein S, Vilhelmsen L, Heraty JM, Sharkey M, Ronquist F. 2013. The hymenopteran tree of life:  
929 evidence from protein-coding genes and objectively aligned ribosomal data. *PLOS ONE* 8:  
930 e69344. <https://doi.org/10.1371/journal.pone.0069344>
- 931 Kück P, Meusemann K, Dambach J, Thormann B, von Reumont BM, Wägele JW, Misof B. 2010.  
932 Parametric and non-parametric masking of randomness in sequence alignments can be  
933 improved and leads to better resolved trees. *Frontiers in Zoology* 7: 10.  
934 <https://doi.org/10.1186/1742-9994-7-10>.
- 935 Lartillot N, Philippe H. 2004. A Bayesian mixture model for across-site heterogeneities in the amino-  
936 acid replacement process. *Molecular Biology and Evolution* 21: 1095–1109.  
937 <https://doi.org/10.1093/molbev/msh112>.
- 938 László Z, Tóthmérész B. 2006. Inquiline effects on a multilocular gall community. *Acta Zoologica*  
939 *Academiae Scientiarum Hungaricae* 52: 373–383.

- 940 Latreille PA. 1802. *Histoire Naturelle, Générale et Particulière, des Crustacés et des Insectes*. Vol. 13.  
941 Paris: F. Dufart, 432 pp.
- 942 Liljeblad J, Ronquist F, Nieves-Aldrey JL, Fontal-Cazalla F, Ros-Farré P, Gaitros D, Pujade-Villar J. 2008.  
943 A Fully Web-Illustrated Morphological Phylogenetic Study of Relationships among Oak Gall  
944 Wasps and Their Closest Relatives (Hymenoptera: Cynipidae). *Zootaxa* 1796: 1–73.
- 945 Liljeblad J, Nieves-Aldrey JL, Nesser S, Melika G. 2011. Adding another piece to the puzzle: the  
946 description of a South African gall wasp and a new tribe (Hymenoptera: Cynipidae). *Zootaxa*  
947 2806: 35–52.
- 948 Liljeblad J, Ronquist F. 1998. A phylogenetic analysis of higher-level gall wasp relationships  
949 (Hymenoptera: Cynipidae). *Systematic Entomology* 23: 229–52.  
950 <https://doi.org/10.1046/j.1365-3113.1998.00053.x>.
- 951 Lobato-Vila I, Bae J, Roca-Cusachs M, Kang M, Jung S, Melika G, Péntzes Z, Pujade-Villar J. 2022.  
952 Global phylogeny of the inquiline gall wasp tribe Synergini (Hymenoptera: Cynipoidea:  
953 Cynipidae): first insights and establishment of a new cynipid tribe. *Zoological Journal of the*  
954 *Linnean Society* zlab085. <https://doi.org/10.1093/zoolinnea/zlab085>.
- 955 Melika G, Abrahamson WG. 2002. Review of the world genera of oak cynipid wasps (Hymenoptera:  
956 Cynipidae: Cynipini). Pp. 150–190 in: Melika G, Thuróczy C (eds), *Parasitic Wasps: Evolution,*  
957 *Systematics and Biological Control*. Agroinform: Budapest.
- 958 Minh BQ, Hahn MW, Lanfear R. 2020. New methods to calculate concordance factors for  
959 phylogenomic datasets. *Molecular Biology and Evolution* 37: 2727–2733.
- 960 Minh BQ, Nguyen MAT, von Haeseler A. 2013. Ultrafast approximation for phylogenetic bootstrap.  
961 *Molecular Biology and Evolution* 30: 1188–95. <https://doi.org/10.1093/molbev/mst024>.
- 962 Mortimer NT, Goecks J, Kacsoh BZ, Mobley JA, Bowersock GJ, Taylor J, Schlenke TA. 2013. Parasitoid  
963 wasp venom SERCA regulates *Drosophila* calcium levels and inhibits cellular immunity.  
964 *Proceedings of the National Academy of Sciences of the United States of America* 110: 9427–  
965 32. <https://doi.org/10.1073/pnas.1222351110>.
- 966 Nguyen L-T, Schmidt HA, von Haeseler A, Minh BQ. 2015. IQ-TREE: a fast and effective stochastic  
967 algorithm for estimating maximum-likelihood phylogenies. *Molecular Biology and Evolution*  
968 32: 268–74. <https://doi.org/10.1093/molbev/msu300>.
- 969 Nicholls JA, Stone GN, Melika G. 2018. A new genus of oak gallwasp, *Protobalandricus* Melika,  
970 Nicholls & Stone (Hymenoptera: Cynipidae: Cynipini) from California. *Zootaxa* 4472: 141–52.
- 971 Nieves-Aldrey JL. 1994. Revision of West-European genera of the tribe Aylacini Ashmead  
972 (Hymenoptera, Cynipidae). *Journal of Hymenoptera Research* 3: 175–206.
- 973 Nieves-Aldrey JL. 2001. *Hymenoptera, Cynipidae*. In: Ramos M, Alba-Tercedor J, Bellés-i-Ros X,  
974 Gosálbez-i-Noguera J, Guerra-Sierra A, Macpherson-Mayol E, Martín-Piera F, Serrano-Marino  
975 J, Templado-González J. (Eds), *Fauna Ibérica*. Museo Nacional de Ciencias Naturales, CSIC:  
976 Madrid, pp. 1–636.
- 977 Nieves-Aldrey JL. 2022. Description of *Fumariphilus* Nieves-Aldrey, gen. nov., a new genus of herb  
978 gall wasps, with a key to genera of the tribe Aulacideini (Hymenoptera: Cynipidae). *Zootaxa* (in  
979 press).
- 980 Nieves-Aldrey JL, Gómez JF, Hernández Nieves M. 2004. Nuevos datos sobre *Aulacidea freesei* y  
981 *Phanacis zwoelferi* (Hymenoptera, Cynipidae, Aylacini), inductores de agallas en *Silybum*  
982 *marianum* (Asteraceae), en la Península ibérica, incluyendo la descripción y comparación de  
983 sus larvas terminales y sus agallas. *Boletín Sociedad entomológica Aragonesa* 34: 85–93.
- 984 Nieves-Aldrey JL, Liljeblad J, Hernández Nieves M, Grez A, Nylander JAA. 2009 Revision and  
985 phylogenetics of the genus *Paraulax* Kieffer (Hymenoptera, Cynipidae) with biological notes  
986 and description of a new tribe, a new genus, and five new species. *Zootaxa*, 2200, 1–40.  
987 <https://doi.org/10.11646/zootaxa.2200.1.1>
- 988 Nieves-Aldrey JL, San Blas G. 2015. Revision of the Neotropical genus *Eschatocerus* Mayr  
989 (Hymenoptera, Cynipidae, Eschatocerini) with biological notes and the first description of the  
990 terminal larva. *Zootaxa* 4012, 135–155. <https://doi.org/10.11646/zootaxa.4012.1.7>

- 991 Nylander JAA, Ronquist F, Huelsenbeck JP, Nieves-Aldrey JL. 2004. Bayesian phylogenetic analysis of  
992 combined data. *Systematic Biology* 53: 47–67. <https://doi.org/10.1080/10635150490264699>
- 993 Paretas-Martínez J, Restrepo-Ortiz C, Buffington M, Pujade-Villar J. 2011. Systematics of Australian  
994 Thrasorinae (Hymenoptera, Cynipoidea, Figitidae) with descriptions of Mikeiinae, new  
995 subfamily, two new genera, and three new species. *ZooKeys* 108: 21–48.
- 996 Péntzes Z, Melika G, Bozsóki G, Bihari P, Mikó I, Tavakoli M, Pujade-Villar P, Fehér B, Fülöp D, Szabó K,  
997 Bozsó M, Sipos B, Somogyi K, Stone GN. 2009. Systematic re-appraisal of the gall-usurping  
998 wasp genus *Synophrus* Hartig, 1843 (Hymenoptera: Cynipidae: Synergini). *Systematic*  
999 *Entomology* 34: 688–711.
- 1000 Peters RS, Krogmann L, Mayer C, Donath A, Gunkel S, Meusemann K, Kozlov A, et al. 2017.  
1001 Evolutionary history of the Hymenoptera. *Current Biology* 27: 1013–18.
- 1002 Pujade i Villar J. 1984. Estudi del comportament individual de *Diastrophus rubi* (Bouché)  
1003 (Hymenoptera, Cynipinae). *Sessió Conjunta d'Entomologia ICHN-SCL* 3: 125–32.
- 1004 Rasplus JY, Nieves-Aldrey JL, Cruaud A. 2022. *Cecinothofagus* is likely a parasitoid of *Aditrochus* gall  
1005 makers. *Preprint* [details will be added when preprint is posted].
- 1006 Ronquist F. 1994. Evolution of Parasitism among Closely Related Species: Phylogenetic Relationships  
1007 and the Origin of Inquilinism in Gall Wasps (Hymenoptera: Cynipidae). *Evolution* 48 (2): 241–  
1008 66.
- 1009 Ronquist F. 1995. Phylogeny and early evolution of the Cynipoidea (Hymenoptera). *Systematic*  
1010 *Entomology* 20: 309–35. <https://doi.org/10.1111/j.1365-3113.1995.tb00099.x>
- 1011 Ronquist F. 1999. Phylogeny, classification and evolution of the Cynipoidea. *Zoologica Scripta* 28:  
1012 139–64. <https://doi.org/10.1046/j.1463-6409.1999.00022.x>
- 1013 Ronquist F, Liljeblad J. 2001. Evolution of the gall wasp-host plant association. *Evolution* 55: 2503–  
1014 22. <https://doi.org/10.1111/j.0014-3820.2001.tb00765.x>
- 1015 Ronquist F, Nieves-Aldrey JL. 2001. A new subfamily of Figitidae (Hymenoptera, Cynipoidea).  
1016 *Zoological Journal of the Linnean Society*, 133: 483–494.
- 1017 Ronquist F, Nieves-Aldrey JL, Buffington ML, Liu Z, Liljeblad J, Nylander JAA. 2015. Phylogeny,  
1018 evolution and classification of gall wasps: the plot thickens. *PLOS ONE* 10: e0123301.  
1019 <https://doi.org/10.1371/journal.pone.0123301>
- 1020 Ronquist F, Nylander JAA, Vårdal H, Nieves-Aldrey JL. 2018. Life history of *Parnips* and the  
1021 evolutionary origin of gall wasps. *Journal of Hymenoptera Research* 65: 91–110.  
1022 <https://doi.org/10.3897/jhr.65.24115>
- 1023 Ros Farre PR, Pujade-Villar J. 2007. Plectocynipinae, a new subfamily of Figitidae and description of a  
1024 new Neotropical genus of Thrasorinae (Hymenoptera: Cynipoidea). *Zootaxa* 1583: 1–13.
- 1025 Salichos L, Rokas A. 2013. Inferring ancient divergences requires genes with strong phylogenetic  
1026 signals. *Nature* 497: 327–331.
- 1027 Samacá-Sáenz E, Egan SP, Zaldívar-Riverón A. 2020. Species diversity in the braconid wasp genus  
1028 *Allorhogas* (Doryctinae) associated with cynipid galls on live oaks (*Quercus*: Fagaceae) using  
1029 natural history, phylogenetics, and morphology. *Insect Systematics and Diversity* 4: 3; 1–20.  
1030 <https://doi.org/10.1093/isd/ixaa011>
- 1031 Sanver D, Hawkins BA. 2000. Galls as habitats: the inquiline communities of insect galls. *Basic and*  
1032 *Applied Ecology* 1: 3–11. <https://doi.org/10.1078/1439-1791-00001>
- 1033 Sharkey MJ, Carpenter JM, Vilhelmsen L, Heraty J, Liljeblad J, Dowling APG, Schulmeister S et al.  
1034 2011. Phylogenetic relationships among superfamilies of Hymenoptera. *Cladistics* 27: 1–33.  
1035 <https://doi.org/10.1111/j.1096-0031.2011.00366.x>
- 1036 Shorthouse JD. 1973. The insect community associated with rose galls of *Diplolepis polita* (Cynipidae,  
1037 Hymenoptera). *Quaestiones entomologicae* 9: 55–98.
- 1038 Sievers F, Wilm A, Dineen D, Gibson TJ, Karplus K, Li W, Lopez R, et al. 2011. Fast, scalable generation  
1039 of high-quality protein multiple sequence alignments using Clustal Omega. *Molecular Systems*  
1040 *Biology* 7: 539. <https://doi.org/10.1038/msb.2011.75>
- 1041 Simão FA, Waterhouse RM, Ioannidis P, Kriventseva EV, Zdobnov EM. 2015. BUSCO: Assessing

- 1042 genome assembly and annotation completeness with single-copy orthologs." *Bioinformatics*  
1043 31: 3210–12.
- 1044 Stone GN, French V. 2003. Evolution: have wings come, gone, and come again? *Current Biology* 13:  
1045 436–438.
- 1046 Stone GN, Schönrogge K. 2003. The adaptive significance of insect gall morphology. *Trends in*  
1047 *Ecology & Evolution* 18: 512–522.
- 1048 Stone GN, Schönrogge K, Atkinson RJ, Bellido D, Pujade-Villar J. 2002. The population biology of gall  
1049 wasps (Hymenoptera: Cynipidae). *Annual Review of Entomology* 47: 633–668.
- 1050 Talavera G, Castresana J. 2007. Improvement of phylogenies after removing divergent and  
1051 ambiguously aligned blocks from protein sequence alignments. *Systematic Biology* 56: 564–  
1052 77. <https://doi.org/10.1080/10635150701472164>
- 1053 Tooker JF, Helms AM. 2014. Phytohormone dynamics associated with gall insects, and their potential  
1054 role in the evolution of the gall-inducing habit. *Journal of Chemical Ecology* 40: 742–753.  
1055 <https://doi.org/10.1007/s10886-014-0457-6>
- 1056 van Noort S, Stone GN, Whitehead VB, Nieves-Aldrey JL. 2007. Biology of *Rhoophilus loewi*  
1057 (Hymenoptera: Cynipoidea: Cynipidae), with implications for the evolution of inquilinism in  
1058 gall wasps. *Biological Journal of the Linnaean Society* 90: 153–172.
- 1059 Wang H-C, Minh BQ, Susko E, Roger AJ. 2018. Modeling site heterogeneity with posterior mean site  
1060 frequency profiles accelerates accurate phylogenomic estimation. *Systematic Biology* 67: 216–  
1061 35. <https://doi.org/10.1093/sysbio/syx068>
- 1062 Waterhouse RM, Seppey M, Simão FA, Manni M, Ioannidis P, Klioutchnikov G, Kriventseva EV,  
1063 Zdobnov EM. 2018. BUSCO applications from quality assessments to gene prediction and  
1064 phylogenomics. *Molecular Biology and Evolution* 35: 543–48.
- 1065 Yoshimoto C. 1970. A new subfamily of Cynipoidea (Hymenoptera) from Nepal. *Canadian*  
1066 *Entomologist* 86: 145–154.
- 1067 Yu G, Smith DK, Zhu H, Guan Y, Lam TT-Y. 2017. GGTREE: an R package for visualization and  
1068 annotation of phylogenetic trees with their covariates and other associated data. *Methods in*  
1069 *Ecology and Evolution* 8: 28–36. <https://doi.org/10.1111/2041-210X.12628>
- 1070 Zhang YM, Egan SP, Driscoe AL, Ott JR. 2021. One hundred and sixty years of taxonomic confusion  
1071 resolved: *Belonocnema* (Hymenoptera: Cynipidae: Cynipini) gall wasps associated with live  
1072 oaks in the USA. *Zoological Journal of the Linnean Society* 193: 1234–1255.
- 1073 Zheng GX, Lau BT, Schnall-Levin M, Jarosz M, Bell JM, Hindson CM, Kyriazopoulou-Panagiotopoulou S  
1074 et al. 2016. Haplotyping germline and cancer genomes with high-throughput linked-read  
1075 sequencing. *Nature Biotechnology* 34: 303–311. <https://doi.org/10.1038/nbt.3432>  
1076

1077 **Table 1.** Life history of the 13 tribes of Cynipidae recognized currently (Ronquist et al. 2015;  
 1078 Lobato-Vila et al. 2022).  
 1079

| Tribe               | Life history                    | Host                                                                                                                                           |
|---------------------|---------------------------------|------------------------------------------------------------------------------------------------------------------------------------------------|
| Aulacideini         | Gall inducers                   | Herbs in the families Asteraceae, Lamiaceae, and others                                                                                        |
| Aylacini (s. str.)  | Gall inducers                   | Poppies (Papaveraceae)                                                                                                                         |
| Ceroptresini        | Inquilines                      | Galls of Cynipini on oaks                                                                                                                      |
| Cynipini            | Gall inducers                   | Oaks, occasionally related trees (Fagaceae)                                                                                                    |
| Diastrophini        | Gall inducers and inquilines    | Gall inducers on Rosaceae ( <i>Rubus</i> and <i>Potentilla</i> ), and inquilines in cynipid galls on Rosaceae ( <i>Rubus</i> and <i>Rosa</i> ) |
| Diplolepidini       | Gall inducers                   | Roses (Rosaceae)                                                                                                                               |
| Eschatocerini       | Gall inducers                   | <i>Vachellia</i> , <i>Prosopis</i> (Fabaceae)                                                                                                  |
| Paraulacini         | Parasitoids (see text)          | <i>Aditrochus</i> (Pteromalidae) gall inducers on <i>Nothofagus</i> (Nothofagaceae, Fagales)                                                   |
| Pediaspidini        | Gall inducers                   | Maples (Sapindaceae)                                                                                                                           |
| Phanacidini         | Gall inducers                   | Herbs, mostly in the families Asteraceae and Lamiaceae                                                                                         |
| Qwaqwaiini          | Gall inducers                   | <i>Scolopia</i> (Salicaceae)                                                                                                                   |
| Rhoophilini         | Inquilines                      | Lepidoptera galls on <i>Searsia</i> (Anacardiaceae)                                                                                            |
| Synergini (s. str.) | Inquilines; a few gall inducers | Galls of Cynipini; a few are true gall inducers on oaks (Fagaceae)                                                                             |

1080  
 1081



1082 **Table 2.** Overview of the species included in this study. For full data on the genome and  
 1083 transcriptome assemblies, see Supplementary Material, Table S1. Abbreviations for data  
 1084 type: G = Previously published genome assembly; NG = New genome assembly reported  
 1085 here, T = Previously published transcriptome. Note that the *Neuroterus valhalla* reference  
 1086 was recorded as *Callirhytis* sp. in the NCBI assembly, and *Belonocnema kinseyi* was  
 1087 recorded under the previous name *B. treatae* (Zhang et al. 2021).  
 1088

| Higher taxon      | Species                             | Life history                                                                                  | Type |
|-------------------|-------------------------------------|-----------------------------------------------------------------------------------------------|------|
| <b>Cynipidae</b>  |                                     |                                                                                               |      |
| Aulacideini       | <i>Aulacidea tavakolii</i>          | Gall inducer on <i>Tragopogon</i> (Asteraceae)                                                | NG   |
|                   | " <i>Aylax</i> " <i>hypecoi</i>     | Gall inducer on <i>Hypecoum</i> (Papaveraceae)                                                | NG   |
|                   | <i>Hedickiana levantina</i>         | Gall inducer on <i>Salvia</i> (Lamiaceae)                                                     | NG   |
|                   | <i>Isocolus centaureae</i>          | Gall inducer on <i>Centaurea</i> (Asteraceae)                                                 | NG   |
| Ayalacini s. str. | <i>Iraella hispanica</i>            | Gall inducer on <i>Papaver</i> (Papaveraceae)                                                 | NG   |
| Ceroptresini      | <i>Ceroptres masudai</i>            | Inquiline in <i>Andricus</i> galls on <i>Quercus</i>                                          | NG   |
| Cynipini          | <i>Andricus curvator</i>            | Gall inducer on <i>Quercus</i> (Fagaceae)                                                     | NG   |
|                   | <i>A. grossulariae</i>              | Gall inducer on <i>Quercus</i> (Fagaceae)                                                     | G    |
|                   | <i>A. quercusramuli</i>             | Gall inducer on <i>Quercus</i> (Fagaceae)                                                     | G    |
|                   | <i>Belonocnema kinseyi</i>          | Gall inducer on <i>Quercus</i> (Fagaceae)                                                     | NG   |
|                   | <i>Biorhiza pallida</i>             | Gall inducer on <i>Quercus</i> (Fagaceae)                                                     | G    |
|                   | <i>Druon quercuslanigerum</i>       | Gall inducer on <i>Quercus</i> (Fagaceae)                                                     | T    |
|                   | <i>Neuroterus valhalla</i>          | Gall inducer on <i>Quercus</i> (Fagaceae)                                                     | G    |
|                   | <i>Protobalandricus spectabilis</i> | Gall inducer on <i>Quercus</i> (Fagaceae)                                                     | NG   |
| Diastrophini      | <i>Diastrophus kincaidii</i>        | Gall inducer on <i>Rubus</i> (Rosaceae)                                                       | NG   |
|                   | <i>Periclistus</i> sp.              | Inquiline in <i>Diplolepis</i> galls on <i>Rosa</i>                                           | NG   |
| Diplolepidini     | <i>Diplolepis spinosa</i>           | Gall inducer on <i>Rosa</i> (Rosaceae)                                                        | NG   |
| Eschatocerini     | <i>Eschatocerus acaciae</i>         | Gall inducer on <i>Vachellia</i> (Fabaceae)                                                   | NG   |
| Paraulacini       | <i>Cecinothofagus ibarrai</i>       | ?parasitoid of <i>Aditrochus</i> (Chalcidoidea) in galls on <i>Nothofagus</i> (Nothofagaceae) | NG   |
| Pediaspidini      | <i>Pediaspis aceris</i>             | Galls on <i>Acer</i> (Aceraceae)                                                              | NG   |
| Phanacidini       | <i>Phanacis</i> sp.                 | Gall inducer on Asteraceae                                                                    | NG   |
| Qwaqwaiini        | <i>Qwaqwaia scolopiae</i>           | Gall inducer on <i>Scolopia</i> (Salicaceae)                                                  | NG   |
| Synergini         | <i>Synergus gifuensis</i>           | Inquiline in <i>Andricus</i> galls on <i>Quercus</i>                                          | G    |

|                               |                              |                                                                                                                 |    |
|-------------------------------|------------------------------|-----------------------------------------------------------------------------------------------------------------|----|
|                               | <i>S. itoensis</i>           | Gall inducer on <i>Quercus</i> (Fagaceae)                                                                       | G  |
|                               | <i>S. japonicus</i>          | Inquiline in <i>Andricus</i> galls on <i>Quercus</i>                                                            | G  |
|                               | <i>S. umbraculus</i>         | Inquiline in <i>Andricus</i> galls on <i>Quercus</i>                                                            | G  |
|                               |                              |                                                                                                                 |    |
| <b>Figitidae</b>              |                              |                                                                                                                 |    |
| Aspicerinae                   | <i>Callaspidia notata</i>    | Parasitoid of syrphid larvae (Diptera) feeding on aphids                                                        | NG |
| Charipinae                    | <i>Alloxysta arcuata</i>     | Hyperparasitoid of aphidiine braconids in aphids                                                                | NG |
|                               | <i>Phaenoglyphis villosa</i> | Hyperparasitoid of aphidiine braconids in aphids                                                                | NG |
| Eucoilinae                    | <i>Ganaspis</i> sp.          | Parasitoid of Diptera larvae                                                                                    | T  |
|                               | <i>Leptopilina boulandi</i>  | Parasitoid of <i>Drosophila</i> larvae (Diptera)                                                                | G  |
|                               | <i>L. clavipes</i>           | Parasitoid of <i>Drosophila</i> larvae (Diptera)                                                                | G  |
|                               | <i>L. heterotoma</i>         | Parasitoid of <i>Drosophila</i> larvae (Diptera)                                                                | G  |
| Parnipinae                    | <i>Parnips nigripes</i>      | Parasitoid of <i>Barbotinia</i> and <i>Iraella</i> (Aylacini s. str.) in galls on <i>Papaver</i> (Papaveraceae) | NG |
|                               |                              |                                                                                                                 |    |
| <b>Outgroups</b>              |                              |                                                                                                                 |    |
| Braconidae:<br>Microgastrinae | <i>Microplitis demolitor</i> | Parasitoid of Lepidoptera larvae                                                                                | G  |
| Chalcidoidea:<br>Pteromalidae | <i>Nasonia vitripennis</i>   | Parasitoid of Calliphoridae and Sarcophagidae larvae (Diptera)                                                  | G  |
| Orussidae                     | <i>Orussus abietinus</i>     | Parasitoid of Coleoptera and Hymenoptera larvae in wood                                                         | G  |

1090 **Table 3.** BUSCO gene sets and the number of species in which they were found. The total  
1091 sequence length is given in nucleotide base pair equivalents; the number of amino acid sites  
1092 is one third of this number.  
1093

| No. species | No. genes (cumulative) | Total length, kb (cumulative) |
|-------------|------------------------|-------------------------------|
| 37          | 31                     | 61.7                          |
| 36          | 92 (123)               | 224 (285)                     |
| 35          | 173 (296)              | 350 (635)                     |
| 34          | 246 (542)              | 602 (1,240)                   |
| 33          | 273 (815)              | 634 (1,870)                   |
| 32          | 300 (1,115)            | 702 (2,570)                   |
| 31          | 380 (1,495)            | 928 (3,500)                   |
| 30          | 404 (1,899)            | 1,020 (4,520)                 |
| <30         | 3,991 (5,890)          | 12,200 (16,800)               |

1094  
1095

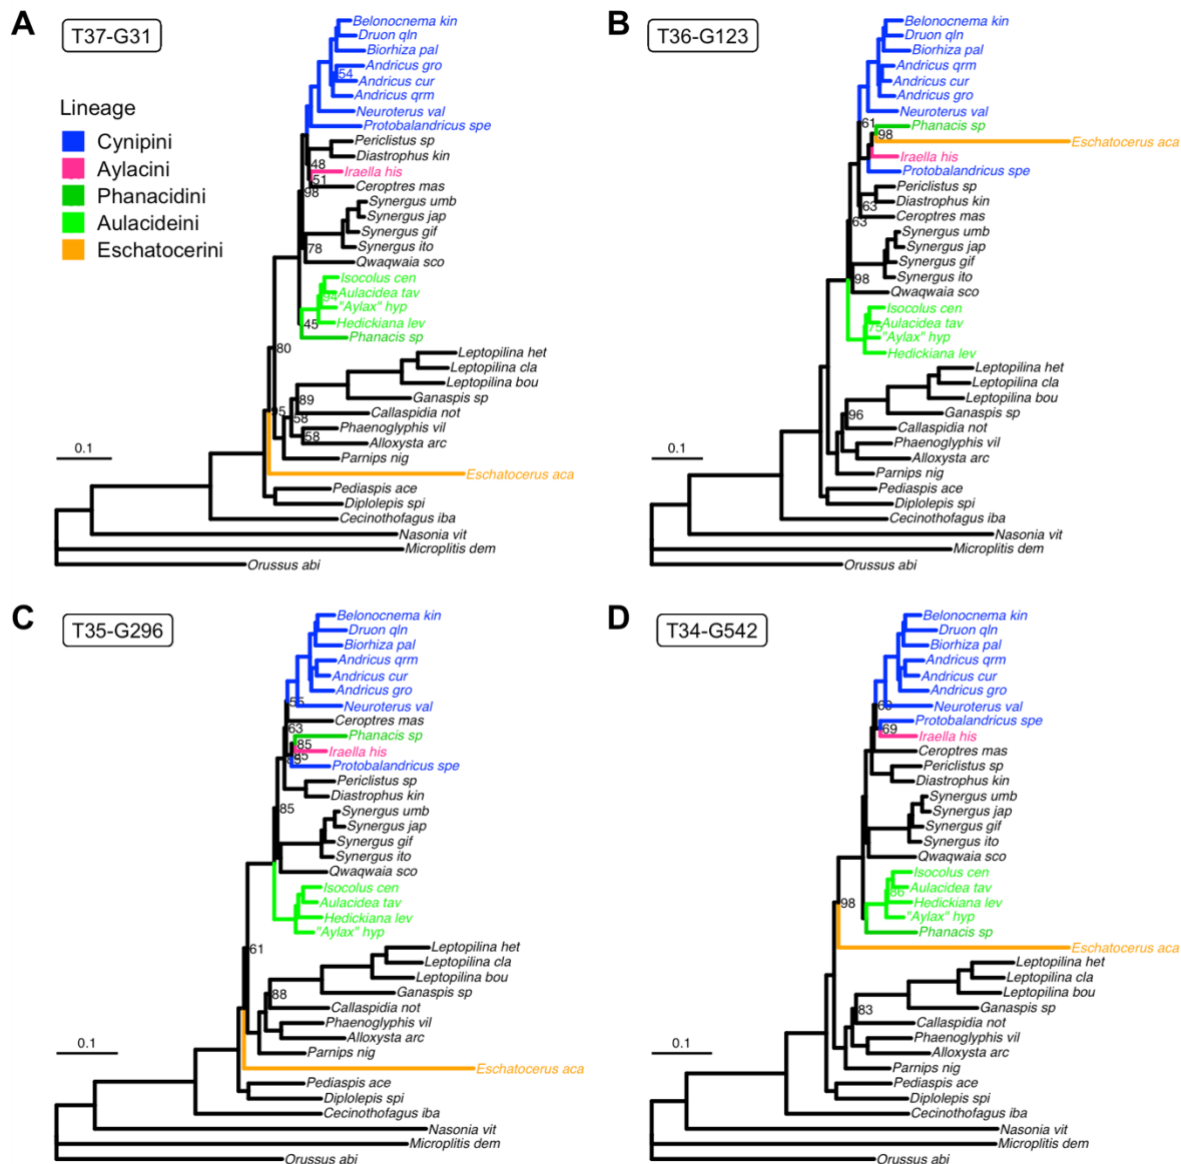

1096  
 1097  
 1098  
 1099  
 1100  
 1101  
 1102  
 1103  
 1104  
 1105  
 1106  
 1107  
 1108  
 1109  
 1110

**Figure 1.** Phylogenetic relationships according to IQTree analyses of different data subsets under the C60+I+G5 substitution model. Support values (ultrafast bootstrap method) are shown on branches only if they are less than 100%. **A.** Analysis of the 31 genes present in all 37 taxa (dataset T37-G31). **B.** Analysis of the 123 genes present in 36 or more taxa (T36-G123). **C.** Analysis of the 296 genes present in 35 or more taxa (T35-G296). **D.** Analysis of the 542 genes present in 34 or more taxa (T34-G542). Note that the smallest dataset (A) results in strong support for Cynipini monophyly (blue clade). In the second smallest dataset (B), this is not the case because *Protobalandricus*, the most basal lineage in Cynipini, groups strongly with *Iraella* (Aylacini), *Phanacis* (Phanacidini) and *Eschatocerus* (Eschatocerini), the latter of which sits on a long branch. When even more data are added, the support for this assemblage successively weakens (C-D), until there is only modest evidence (69% bootstrap support) against Cynipini monophyly in the largest dataset (D).

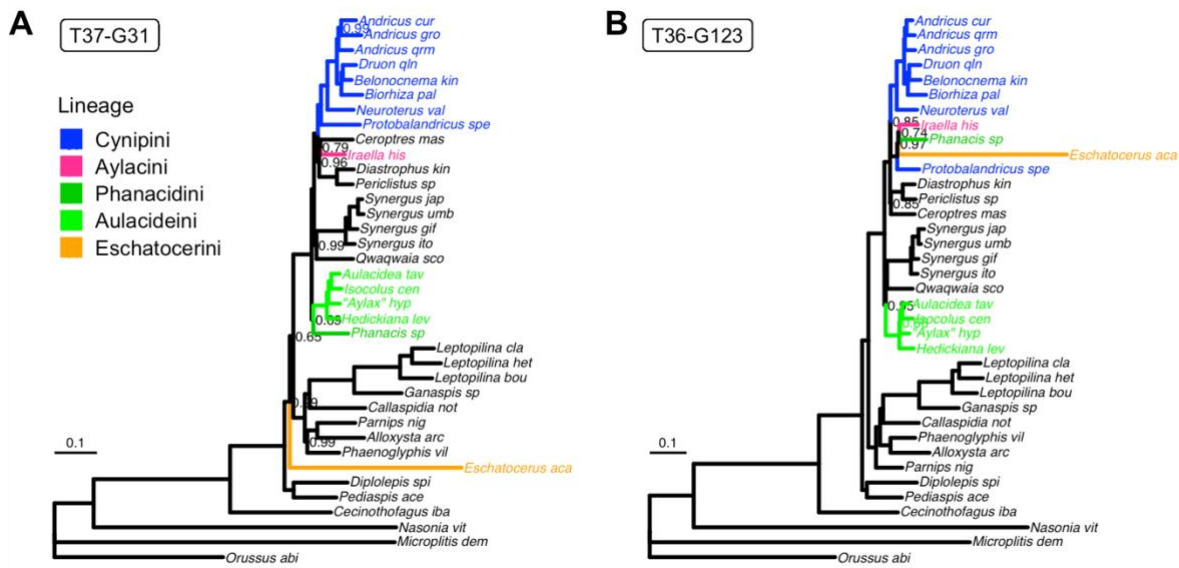

1111

1112

1113

1114

1115

1116

1117

1118

1119

**Figure 2.** Phylogenetic relationships according to PhyloBayes analyses of the two smallest data subsets under the CAT-F81 model. Support values (posterior probability) are shown on branches only if they are less than 1.0. **A.** Analysis of the 31 genes present in all 37 taxa (dataset T37-G31). **B.** Analysis of the 123 genes present in 36 or more taxa (T36-G123). Despite the more sophisticated CAT-F81 model, which learns the amino-acid profiles from the data, the results are virtually identical to the corresponding results of IQTree (Fig. 1A, B).

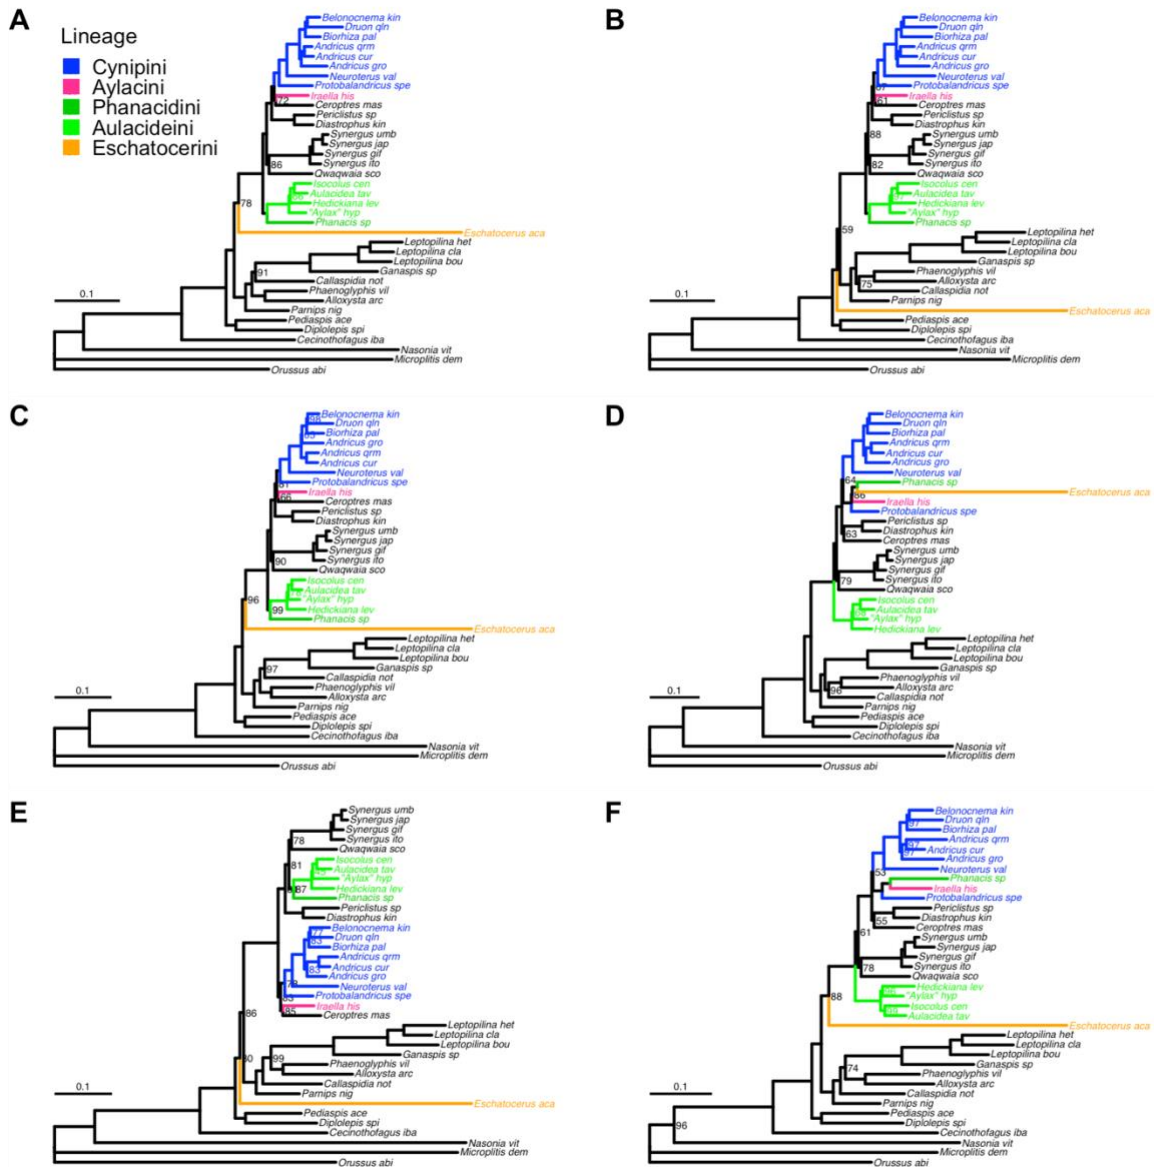

1120  
1121  
1122  
1123  
1124  
1125  
1126  
1127  
1128  
1129  
1130  
1131  
1132  
1133  
1134

**Figure 3.** Phylogenetic results for six equally-sized, quality-ranked subsets of the T34-G542 dataset, analyzed using IQTree under the C60+I+G5 model. The raw alignments were subjected to filtering and quality ranking by Gblocks. Support values (ultrafast bootstrap) are shown on branches only if they are less than 100%. **A.** Less than 13% of sites filtered out (best quality). **B.** From 13% to 26% filtered out. **C.** From 26% to 37% filtered out. **D.** From 37% to 47% filtered out. **E.** From 47% to 59% filtered out. **F.** More than 59% filtered out (worst quality). The three best subsets (A-C) yield congruent results except for the position of *Eschatocerus*, which varies slightly but without strong conflict in support values. All have monophyletic Cynipini (blue lineages), and none of them group Phanacidini, Aylacini and Eschatocerini with each other or with *Protobalandricus*, as seen in some of the poor-quality data subsets (D, F).

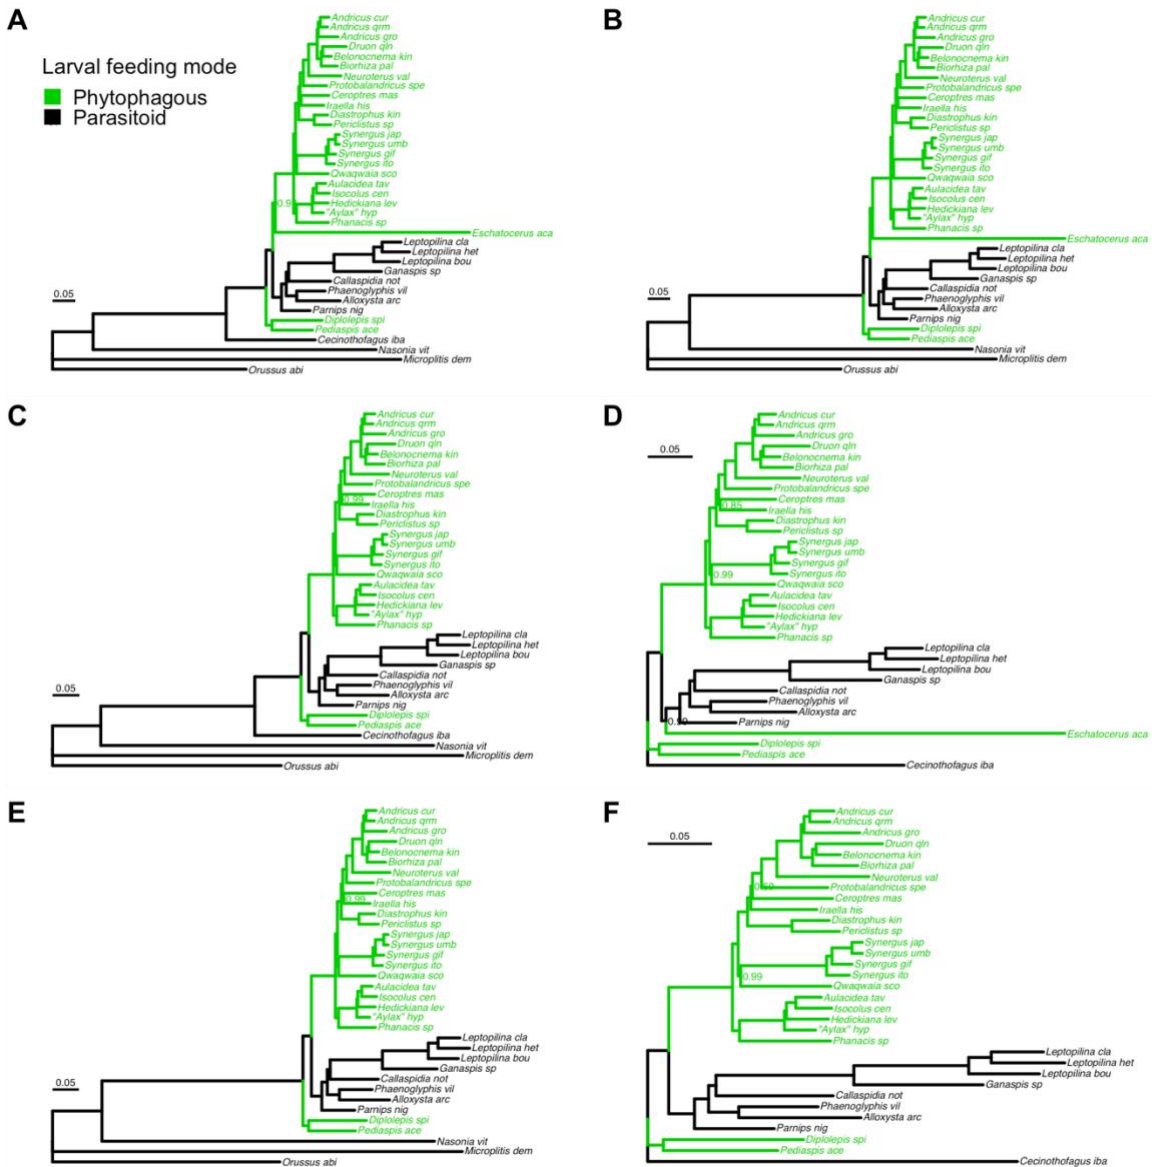

1135  
 1136  
 1137  
 1138  
 1139  
 1140  
 1141  
 1142  
 1143  
 1144  
 1145  
 1146  
 1147  
 1148  
 1149

**Figure 4.** Testing the potential effect of long-branch taxa on phylogenetic results. For these analyses, we used the best third of the T34-G542 alignments, that is, the alignments where Gblocks filtered out 26% or less of the sites (see Fig. 3). For the best possibility of detecting model-related long-branch attraction effects, we used PhyloBayes and the CAT-F81 model. Branch support values (posterior probability) are only shown if they are less than 1.0. **A.** Analysis of the full taxon set. **B.** *Cecinothofagus* excluded. **C.** *Eschatocerus* excluded. **D.** Outgroups excluded. **E.** *Cecinothofagus* and *Eschatocerus* excluded. **F.** *Eschatocerus* and outgroups excluded. Regardless of taxon exclusion, the relationships among the included lineages remain identical to those in the full analyses, except for a slight variation in the position of *Eschatocerus* when outgroups are excluded (D). Notably, the phytophagous groups (gall inducers and inquilines, green) remain diphylectic in all analyses with respect to the parasitoid lineages (black).

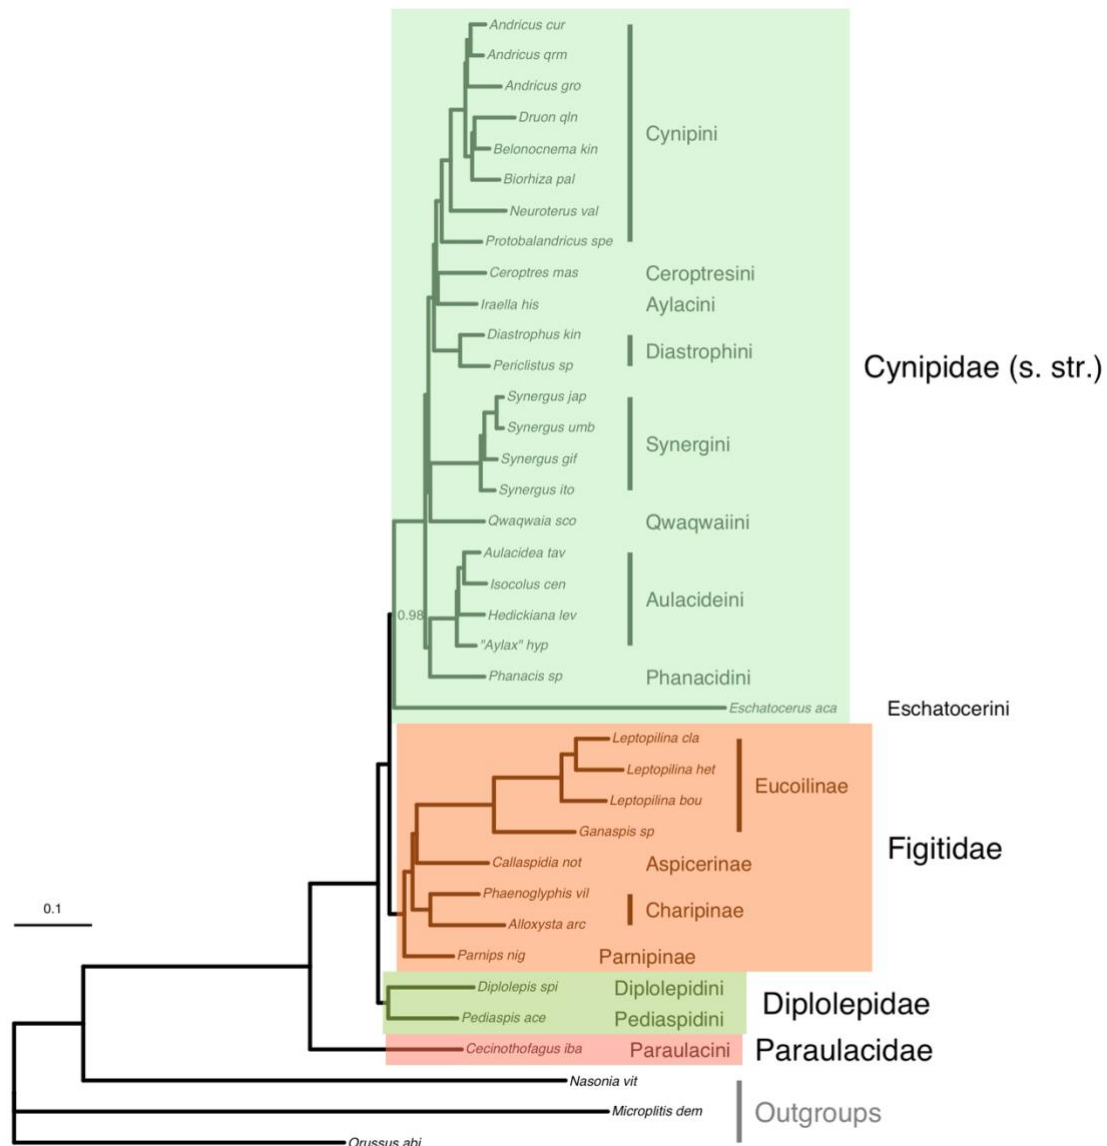

1150  
1151  
1152  
1153  
1154  
1155  
1156

**Figure 5.** Preferred hypothesis of phylogenetic relationships. The tree is based on the best third of the alignments that include at least 34 of the 37 taxa (T34-G542 dataset, Gblocks filtering removed less than 26% of sites), analyzed using PhyloBayes under the CAT-F81 model (the same analysis shown in Fig. 4A). Current cynipid tribes and figitid subfamilies are indicated, together with the proposed new classification of cynipid lineages into three distinct families.



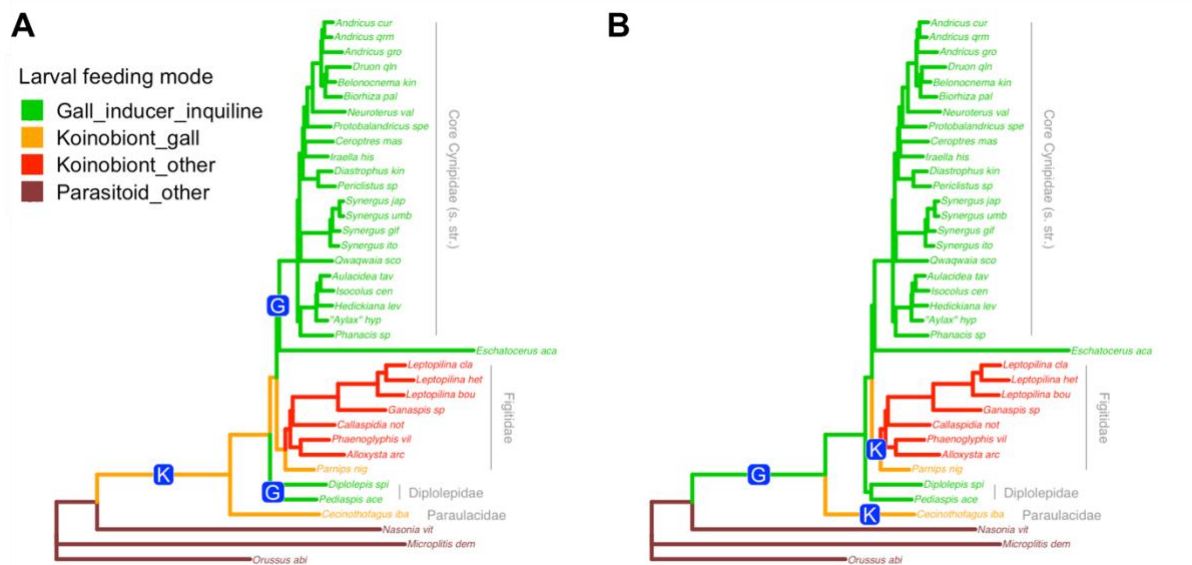

1157  
1158  
1159  
1160  
1161  
1162  
1163  
1164  
1165  
1166  
1167  
1168

**Figure 6.** Two possible scenarios for the origin of major life-history types in the Cynipoidea. **A.** *Independent phytophagy scenario.* The ancestor of cynipoids was a koinobiont endoparasitoid (at least in early instars) of gall inducing insects (orange lineages, origin of koinobionts marked with “K”). The ancestral life history persists today in the Paraulacidae and basal lineages of Figitidae, like the Parnipinae. Gall inducers and inquilines originated twice from these koinobionts of gall insects (“G”). **B.** *Parasitoid reversal scenario.* The koinobiont endoparasitoids of gall insects (“K”) evolved independently in the Paraulacidae and Figitidae, possibly in both cases from phytophagous gall inducers and inquilines (“G”). In both scenarios, advanced figitid lineages (in red) remained koinobiont parasitoids of insects but colonised hosts in other environments.

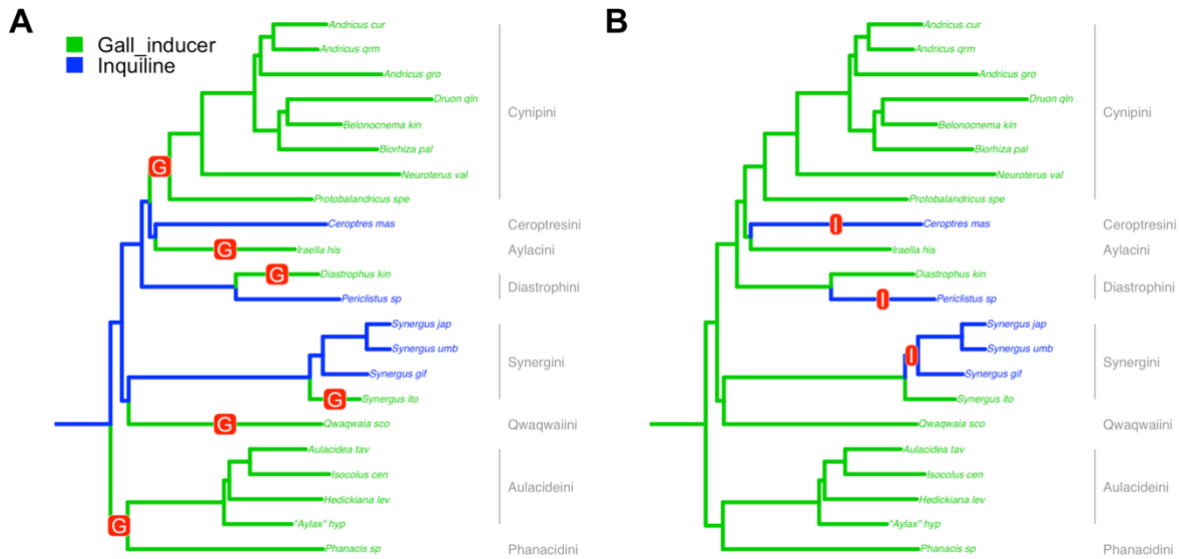

1169  
1170  
1171  
1172  
1173  
1174  
1175  
1176  
1177  
1178  
1179  
1180

**Figure 7.** Two possible extreme scenarios for the origin of gall inducers (green lineages) and inquilines (blue lineages) in the Cynipidae (s. str.) (*Eschatocerus* excluded because of uncertainty concerning its life history). **A.** *Inquiline-first scenario.* Gall inducers evolved repeatedly from inquilines, which represent an intermediate stage in the origin of true gall inducers. At least six independent origins of gall inducers will have to be assumed for the included lineages, seven if additional evidence is considered (see text). **B.** *Gallers-first scenario.* In this scenario, inquilines represent gall inducers that have lost the ability to initiate galls. At least three independent origins of inquilines will have to be assumed for the included lineages, ten if additional evidence is considered (see text). In reality, evolution may have taken a path that involved transitions in both directions.
